# Supplementary material for: Contrasting ice formation in Arctic clouds: surface coupled vsdecoupled clouds
Source: Copernicus journal article supplement (doi:10.5194/acp-2020-1096), 2020-11-12
Supplement: Supplementary file [file acp-2020-1096-AC1-supplement.pdf]

# Author's response to two anonymous reviews for ACP-2020-1096

We thank the two referees for their time and providing us with their comments and ideas, which improved the quality of the manuscript. We have revised the manuscript considering the points raised by the reviewers and provide here a point-to-point answer to the single remarks (the referee comments are highlighted in blue-italic). The page, line and figure numbering refer to the revised manuscript. Additionally a diff-version of the manuscript is provided for tracking the changes.

## Specific reply to Referee #1

### Major comments:

*- The authors have the 35 GHz ground-based radar data at their disposal, one of the best remote-sensing instruments for the detection of precipitating hydrometeors (and ice particles in particular), even in very small concentrations. Yet, they only use the lidar data to detect precipitation. Commonly occurring cases of weak Arctic precipitation can be missed by lidars in such cases, as a result of the potentially minor contribution of very small ice concentrations to an air volume's total cross-sectional area of scatterers (e.g., when including nearly spherically-shaped aerosols). This is also evident in Fig. 2, where there is a clear indication of (weak) precipitating fall streaks in the radar data between 18-21 UTC (also suggested by the depolarization plot), even though this period is classified as an ice-free cloudy period. I think that the authors should incorporate the radar data in their analysis, because at the moment, weakly precipitating clouds could significantly change their analysis results (see for example Fig. 3 in Buhl et al., 2013; <https://agupubs.onlinelibrary.wiley.com/doi/full/10.1002/grl.50792>) in the proceeding figures.*

Indeed the cloud radar Mira-35 is much more sensitive to ice detection as the lidar. As mentioned in Buhl et al. (2013) the lidar has a detection threshold in IWC of about  $10^{-6} \text{ kg m}^{-3}$ . But, as shown in Griesche et al. (2020) frequently low clouds were observed during the analyzed campaign with a cloud base below the lowest detection range of the radar (155m above the instrument). In some cases, even the cloud top was below this height. These clouds would have been falsely classified using the cloud radar only, while these clouds are actually those closest to the surface and therefore most likely coupled to it. Using the near-field capabilities of our polarization lidar Polly<sup>XT</sup> is thus a prerequisite for the presented coupling study. Another point is that we wanted to do a study that is comparable to previous studies, as the one of Kanitz et al. (2011). Nevertheless, we created the same analysis of the ice-containing clouds for surface-coupled and –decoupled cases (see Fig. 1). As to be expected the amount of ice containing clouds increased, yet ice-containing surface-coupled profiles were both absolutely (i.e. the numbers of profiles) and relatively (i.e. the fraction of ice-containing clouds) more frequent. To conclude this point: we think that the challenges we would be facing including the cloud radar for the ice detection would have deformed the statistics by excluding the very near clouds, and would have made a comparison to other studies difficult. And last but not least, the observed effect (more surface-coupled ice-containing cloud profiles with a IWC down to  $10^{-6} \text{ kg m}^{-3}$ ) would not be affected by radar observations. To discuss this and the following points regarding the methodology, we added the Subsection 4.2 *Methodology and instrument effects* in the Discussion Section (the usage of the lidar for the ice detection is discussed on page 15, line 1-6). Additionally the results are presented in Appendix A.

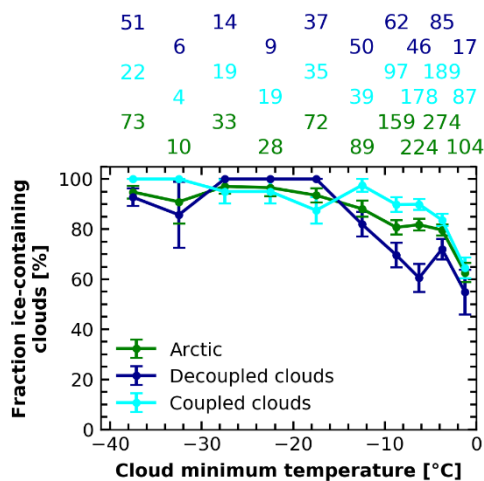

**Figure 1:** Fraction of ice-containing clouds determined using the cloud radar for ice detection. In green the results of the complete data set is shown, in cyan for the coupled clouds and in dark blue for the decoupled clouds.

- In continuation of the previous comment regarding ice detection using lidar depolarization ratio data, the analysis could have been influenced by specular reflection from plate ice crystals within the -20 – (-8) °C temperature range. In these cases where plates precipitate from the cloud base, the determined cloud base might be lower than it actually is (depending on the depolarization threshold), and a cloud can be classified as ice-free since the change in depolarization or the depolarization threshold for ice detection (not clear from the text) is not strong enough. I know that the common tilting of lidars by a few to several degrees off zenith (e.g., 5 degrees as in the PS106 voyage) is commonly believed to address this specular reflection issue, but that is a common misconception, as it does not consider commonly observed higher canting angles of ice particles (see for example Appendix A in Silber et al., 2018; <https://agupubs.onlinelibrary.wiley.com/doi/full/10.1029/2017JD027840>, Noel et al., 2002; <https://agupubs.onlinelibrary.wiley.com/doi/abs/10.1029/2002GL014828>).

We agree that the issue of specular reflection is not discussed well enough in the manuscript. However, since this effect is most prominent for rather large dendrites, which form at a temperature of roughly -15°C, we think specular reflection has little influence on our findings where we found the strongest influence at a temperature above -10°C. We extended the Discussion section and elaborated the effect in more detail (see page 15, line 7 and the following).

- I find the theta criterion for the determination of surface coupling state problematic because it doesn't consider the cloud height above the surface, which could result in more lower-level clouds being classified as coupled. As an example, a cloud base at 200 m with theta difference just below 0.5 K (e.g., theta of 260 K at the surface rising linearly to roughly 261 K at cloud base) would be considered coupled even though  $d\theta/dz = 5 \text{ K/km}$ , which is strongly stratified. In their analysis, the authors should take into consideration the height dimension as well as the measurement uncertainty of the RS-41 radiosondes (0.3 °C in T, 4% in RH). The current potential for a low-level coupled cloud bias could contribute to the stark coupled vs. decoupled ice occurrence fraction differences at higher temperatures discussed in Fig. 4, given the summertime dataset manifested in the greater occurrence of lower, warmer clouds (see for example the results from Svalbard in Nomokonova et al., 2019; <https://acp.copernicus.org/articles/19/4105/2019/>).

To test the influence of the theta gradient on the coupling retrieval, we set a gradient-threshold for the coupled state. The threshold was set to the minimum gradient between surface and liquid layer base observed during this study in the case of decoupling, which was  $d\theta/dz = 2 \text{ K/km}$ . In Figure 2, the retrieved results are shown. As expected the number of decoupled profiles increased at the

expense of coupled profiles. And with the number of profiles also the frequency of occurrence of surface-decoupled ice-containing profiles increased. Yet, in case of surface coupling the frequency of occurrence of ice clouds increases even stronger. Hence, those profiles, which were classified as coupled with our original retrieval but decoupled when the gradient-threshold is considered, have a higher fraction of liquid-only than ice-containing clouds (increase in frequency of occurrence of surface-coupled ice-containing profiles). Still, the fraction of ice-containing clouds within the reclassified profiles is higher, compared to the originally surface-decoupled classified profiles (hence, also an increase in frequency of occurrence of surface-decoupled ice-containing profiles). In addition (not shown but as predicted by the reviewer) the reclassification only concerns clouds with a liquid cloud base at or below 400m (with the majority at 200m or below). The proximity of those clouds to the surface increases the likelihood of an effect of surface originated aerosols. We conclude that, despite the deficiencies of our original approach to determine the surface coupling state, we stick to this retrieval as this was already used in Gierens et al. (2020). We have discussed these points in the manuscript on page 16, line 6-11 and presented the results in Appendix B.

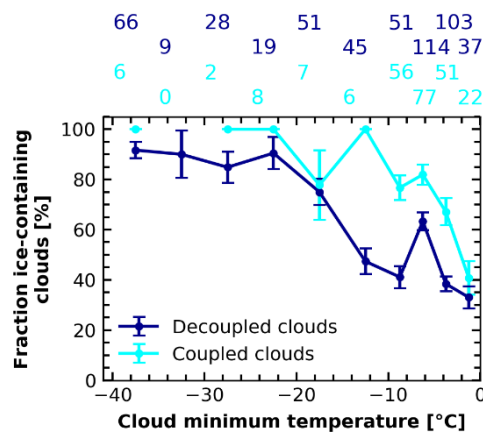

**Figure 2:** Fraction of ice-containing clouds determined using also a threshold in the potential temperature gradient to identify surface-coupling (cyan surface-coupled clouds and dark blue decoupled clouds).

The measurement uncertainty of the radiosonde can be split into systematic and random errors. Comparing values within one radiosonde profile, a systematic uncertainty is rather negligible, as it is correlated throughout the profile. Random uncertainties on the other hand, can vary in sign and magnitude for each point. The standard deviation between twin soundings up to 100hPa are given by Vaisala for the RS-92 (which was still used during PS106) for temperature as 0.2°C and for pressure as 0.5 hPa hPa (Jensen et al., 2016). To test how this might influence the coupling retrieval, we used error propagation to determine the uncertainty in the potential temperature profile  $\Delta\theta$ . The error was used to estimate an upper and lower threshold boundary of the coupling retrieval ( $0.5K \pm \Delta\theta$ ) and to repeat the coupling retrieval with these two values. The effect on the fraction of ice-containing clouds for the coupled and decoupled cases was located within the statistical uncertainty of the results (Fig. 3). Hence, we stick to our original analysis, but made the reader of the manuscript aware that the measurement uncertainty of the radiosonde has not been considered (see page 16, line 11-13 and Appendix B)

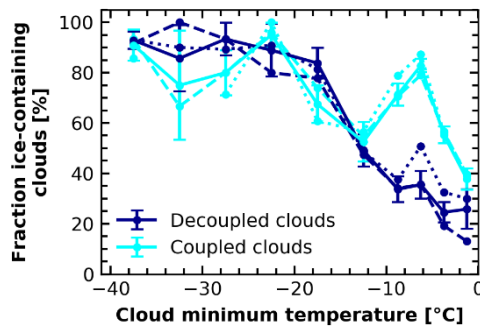

**Figure 3:** Continuous lines same as Fig. 4 of the manuscript. The dashed lines represent the respective results for the upper end of the error margin (i.e. profiles were classified as decoupled using a threshold for the coupling state of  $0.5K + \Delta\theta$ ) and the dotted lines represent the lower end of the error margin (i.e. profiles were classified as decoupled using a threshold for the coupling state of  $0.5K - \Delta\theta$ ).

- *Estimation of the INP number concentration: the method in Mamouri and Ansmann (2016) relied on European and Mediterranean data of aerosol mixtures, the values of which can be significantly different from Arctic regions (see for example Kanji et al., 2017, <https://journals.ametsoc.org/mono/article/doi/10.1175/AMSMONOGRAPHS-D-16-0006.1/28236>). Moreover, in the Arctic alone it has been shown that there is high INP variability and that INP concentrations are not correlated with multiple types of aerosols (e.g., Wex et al., 2019, <https://acp.copernicus.org/articles/19/5293/2019/>). Given the fact that based on our current knowledge INP occupy only a small fraction of the total aerosol number concentrations (and likely their projected area), there are just too many degrees of freedom in the INPNC retrieval and I do not see how can the authors estimate the INPNC even with the scaling factor they decided to use, and do not see how their conclusions could be dismissed even without the rather short INPNC analysis discussion. I find it very hard to believe that the uncertainties in INPNC (as shown in Figure 6) are smaller than an order of magnitude.*

We have decided to remove the Section of the INPC estimation together with Figure of the INPC (Fig. 6b in the old manuscript). The reason for this is the great uncertainty of the presented approach. Instead, we extended the discussion on the measured attenuated backscatter coefficient values, including the lack of parametrizations for INP in the Arctic (see page 14, line 1-16).

#### Minor comments:

- *There is no information on the route of the PS106 voyage. I recommend adding a map for reference or at the very least specify the latitude/longitude ranges of that voyage.*

A Figure with the PS106 track and dates is added.

- *p. 1 l. 2 - suggest defining that OCEANET is a platform in the first instance.*

Done.

- *p. 1 l. 11-12 "This provides further evidence : : " – this sentence is not supported by the analysis and is not explicitly discussed in the text. I recommend removing it or revising the analysis and text accordingly.*

We complemented the discussion by a back-trajectory analysis (page 14, line 17-25).

- *p. 1 l. 13 – "acting as seeds for ice multiplication" – again, this impact of seeding from below is not discussed and supported by the text (might be suggested only implicitly in the discussion about blowing snow).*



We considered this point more explicitly in the discussion.

*- p.1 l. 16-18 - suggest reordering these two sentences.*

The Section about the INPC estimation has been removed from the manuscript.

*- p. 1 l. 23 - "above the one" - suggest rewording*

Done.

*- p. 3 l. 34 - "as it is the case for the 35-GHz ..." - Even though the ARM KAZR is a valid example, I recommend either removing this part of the sentence or providing a different example, because the KAZR nor the Barrow site are not discussed in this paper.*

We have raised this point using the ARM KAZR because the limitation to detect the most-likely surface-coupled clouds below 150 m height concerns also this instrument. We consider this point as important because it hinders one to use the temporally extensive ARM datasets to be utilized for coupling studies similar to the one presented in here.

*- p.3 l.21 - "First studies ..." - I do not understand this sentence - suggest rewording*

The paragraph has been reframed.

*- p. 3 l.27-29 - is this \*the main feature\* of Arctic clouds, or simply one of their common features? Also, do the clouds necessarily form in inversions, or do they form the inversions? I think that both options are plausible (see for example Morrison et al., 2012; <https://www.nature.com/articles/ngeo1332>, Silber et al., 2020; <https://agupubs.onlinelibrary.wiley.com/doi/full/10.1029/2020GL087099>, Sedlar, 2014; [https://journals.ametsoc.org/view/journals/apme/53/12/jamc-d-14-065.1.xml?tab\\_body=fulltext-display](https://journals.ametsoc.org/view/journals/apme/53/12/jamc-d-14-065.1.xml?tab_body=fulltext-display))*

We reworded the paragraph and also considered nonturbulent formation of Arctic clouds.

*- p. 6 l.3 - please clarify whether the linear or circular depolarization ratios are used (I suspect the former).*

The volume depolarization was used, which is derived from the linear depolarization ratio measurement of the lidar.

*- p. 9 l. 31 - it could be the vast majority of clouds (> 80%) but this is certainly not every cloud.*

We reworded that sentence stating that the majority of clouds contains ice.

*- What are the depolarization thresholds for the determination of liquid and ice? Are there backscatter thresholds as well? These values should be explicitly specified for reproducibility by potential readers.*

Similar to a comparable concern raised by reviewer 2 we point to the difficulty in separating ice and liquid clouds by the lidar volume depolarization. There have not been many studies on a quantification of the lidar volume depolarization on ice detection, as volume depolarization ratio is the superposition of molecular and particulate backscatter in the co- and cross-channels. To tackle this obstacle we used manpower to manually analyze the data set and provided a detailed explanation of the methodology.

Therefore we decided to describe the applied method in detail. We analyzed the complete available data set. The only periods that have been excluded from the analysis, are as described those with favorable seeding conditions (i.e., a cloud above the analyzed cloud within 1km). Combined with the fact that all data is freely available, this study should be reproducible by anybody given the description of the methodology in the article.

Nevertheless we made a first attempt to provide a depolarization threshold on the ice detection, which is shown below. We calculated a minimum volume depolarization where the lidar should be able to detect ice. This is based on an ice water content detection threshold of  $10^{-6} \text{ kg m}^{-3}$  (Bühl et al., 2013) which was converted into lidar extinction using the approach of Hogan et al. (2006). Using a lidar ratio of 30 sr (typical single-scattering lidar ratio of ice crystals, see, e.g., Seifert et al., 2007) we calculated

the particle backscatter coefficient. The molecular backscatter coefficient at 532-nm (wavelength of the used depolarization channels) was derived using scattering theory (Hinkley, 1976) for a temperature of -10°C and air pressure of 925 hPa (ca. 700 m height). Assuming a particle depolarization ratio of ice crystals of 0.5, a minimum volume depolarization of 0.03 was found corresponding to the ice detection threshold of  $10^{-6} \text{ kg m}^{-3}$ .

This threshold was used to reproduce our study with an automatic approach. We defined a volume depolarization signal above 0.03 in four contiguous lidar range gates, but below the liquid-cloud base, as an ice layer. An ice-containing cloud profile was defined, when during half of the profile time an ice layer with volume depolarization ratio  $> 0.03$  was detected. The results are presented in Fig. 4. While we found minor quantitative differences between the manually analyzed data set below -15°C, the main message of this manuscript remains: The occurrence of ice-containing surface-coupled cloud profiles at temperatures above -10°C is much higher compared to surface-decoupled profiles.

We consider an implementation of the automatic ice detection algorithm introduced above as a promising approach for future studies. For the sake of compatibility to our previous studies (Kanitz et al., 2011) we however suggest to follow the original approach presented in the manuscript.

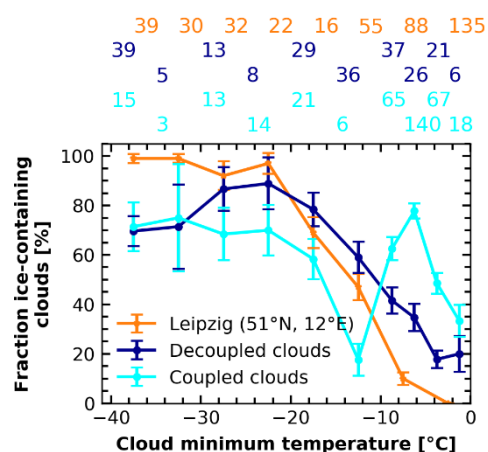

**Figure 4:** Fraction of ice-containing clouds determined using a volume depolarization threshold of 0.03. In dark blue the results for surface-decoupled clouds are shown and in cyan those for surface-coupled clouds. In orange results for Leipzig, Germany from Kanitz et al. (2011) are presented. The numbers above the plots represent the respective profile behind each data point.

- p. 7 l. 1 - *what is the slope or the metric with which cloud top is defined? This should also be specified.*  
The cloud top has been derived by the highest cloud radar range gate, which was classified as cloud. The minimum detection threshold of the cloud radar was 5 times the signal to noise ratio in the co-channel. This information has been added to the manuscript at page 7, line 14-17.

- p. 7 l. 5 - *"coldest temperature" - temperatures can lower but not colder – suggest rewording here and in other locations in the text.*  
Reworded.

- p. 7 l. 6-9 - *This method of using the inversion base temperature as cloud top temperature may explain some of this study's results, as the assumption becomes less valid in cases where clouds protrude into temperature inversions, which often occur concurrently with stronger mixing, not necessarily down to the surface. I think that in the context of this paper the authors might be able to make their point by defining their current "cloud top temperature" as "minimum cloud temperature", which would also be valid for cloud protruding into an inversion, and would retain the essence of INP activation temperature widely discussed in the text. Also, note that not all polar liquid-bearing clouds are capped by a temperature inversion. See for example Sedlar and Tjernström,*

2009; <https://link.springer.com/article/10.1007/s10546-009-9407-1>, Sedlar et al., 2012; [https://journals.ametsoc.org/view/journals/clim/25/7/jclid-11-00186.1.xml?tab\\_body=fulltext-display](https://journals.ametsoc.org/view/journals/clim/25/7/jclid-11-00186.1.xml?tab_body=fulltext-display), Sotiropoulou et al., 2014; <https://acp.copernicus.org/articles/14/12573/2014/>, Silber et al., 2020; <https://agupubs.onlinelibrary.wiley.com/doi/full/10.1029/2020GL087099>

We changed our wording from "cloud-top temperature" to "minimum cloud temperature". Additionally, as suggested by reviewer we have stated more clearly how the temperature was obtained (minimum temperature between liquid layer base and cloud top, see page 8, line 18-19).

*- p. 7 l. 12-14 - based on the fact that the authors have used the radar for this seeding cloud proximity criterion, I think that they refer here to overlying hydrometeors rather than overlying clouds. If that is correct I recommend revising the text accordingly.*

That is correct. We changed the text accordingly.

*- p. 9 l. 31 - it could be the vast majority of clouds (> 80%) contain ice but this is certainly not every cloud as currently stated in the text.*

We reworded that sentence stating that the majority of clouds contain ice.

*- Fig. 3 caption confusion - deltaT should be 5 C below -10 C and vice versa.*

Corrected.

*- p. 11 l. 13-14 - "The reasons for the increase in ice forming efficiency for low and coupled clouds in the Arctic must be caused..." - while this is likely the case, I think that the authors should tone down this sentence.*

We reworded that sentence.

*- p. 12 l.10-11 - decoupling does not necessarily mean that there is an underlying inversion, but only that the underlying layer is stable. I suggest revising the text accordingly.*

We reworded that sentence.

*- p. 12 l. 11-13 - clouds largely act to destabilize the polar atmosphere and not the opposite. Another more likely possibility is that once the marine aerosols are mixed aloft, the atmosphere becomes decoupled as a result of radiative cooling of the surrounding ice surfaces.*

We decided to make our discussion more general by stating that we do not have information about the evolution of the cloud before reaching the observation site.

*- p. 12 l. 16 - add "as" before "such"*

Done.

*- p. 12 l. 23 - define beta*

Done.

*- p. 12 l.13 - a reduction in beta is generally seen throughout the atmospheric profile regardless of the decoupling height (and sometimes increases above the decoupling height such as in the green and blue curves), so I find this argument by the authors to be rather subjective.*

The INPs abundance discussion was comprehensively reworded and made more clear. The observed increase of beta above the decoupling height is due to a cloud. This information has been added to the manuscript (page 14, line 5-6).

*- Fig. 6 - what do the normalized 0 and 2 values represent?*

0 is the surface and 2 is 2 times the decoupling height. The axes labels have been improved.

*- p. 13 l.1 - Temperature units are missing.*

Paragraph has been deleted. See answer to major remark of INPC estimation.

## Specific reply to Referee #2

### Major comments:

*The dataset is limited one month and half in 2017: despite the fact it must be acknowledged the considerable effort spent to collect the presented measurements, a dataset with a longer time coverage covering at least two seasons – discussed also in conjunction with a more detailed meteorological analysis - could provide more robust results. The effect of the limited dataset time coverage may have an effect on the discussed results and this should be considered.*

The reviewer rises the legitimate concern about the limitation of the dataset. Indeed we would like to analyze a longer time series, but this is what we had available for our study. We incorporated this point into the discussion of the manuscript (page 14, line 26-29).

*In the identification of ice clouds (section 2.1 Ice-containing cloud analysis), the description of the procedure applied to classify and characterize individual cloud profiles is purely qualitative, the thresholds applied to the value of the depolarization and backscattering coefficient are not mentioned indicating that the profiles have been evaluated on a subjective basis.*

We did not provide quantitative thresholds about how we separated ice and liquid clouds because of the difficulty in doing so. There have not been many studies on a quantification of the lidar volume depolarization on ice detection, as volume depolarization ratio is the superposition of molecular and particulate backscatter in the co- and cross-channels. To tackle this obstacle we used manpower to manually analyze the data set.

Therefore, we decided to describe the applied method in detail. We analyzed the complete available data set. The only periods that have been excluded from the analysis, are as described those with favorable seeding conditions (i.e., a cloud above the analyzed cloud within 1km). Combined with the fact that all data is freely available, this study should be reproducible by anybody given the description of the methodology in the article.

Nevertheless, we made a first attempt to provide a depolarization threshold on the ice detection, which is shown below. We calculated a minimum volume depolarization where the lidar should be able to detect ice. This is based on an ice water content detection threshold of  $10^{-6} \text{ kg m}^{-3}$  (Bühl et al., 2013) which was converted into lidar extinction using the approach of Hogan et al. (2006). Using a lidar ratio of 30 sr (typical single-scattering lidar ratio of ice crystals, see, e.g., Seifert et al., 2007) we calculated the particle backscatter coefficient. The molecular backscatter coefficient at 532-nm (wavelength of the used depolarization channels) was derived using scattering theory (Hinkley, 1976) for a temperature of  $-10^{\circ}\text{C}$  and air pressure of 925 hPa (ca. 700 m height). Assuming a particle depolarization ratio of ice crystals of 0.5, a minimum volume depolarization of 0.03 was found corresponding to the ice detection threshold of  $10^{-6} \text{ kg m}^{-3}$ .

This threshold was used to reproduce our study with an automatic approach. We defined a volume depolarization signal above 0.03 in four contiguous lidar range gates, but below the liquid-cloud base, as an ice layer. An ice-containing cloud profile was defined, when during half of the profile time an ice layer with volume depolarization ratio  $> 0.03$  was detected. The results are presented in Fig. 1. While we found minor quantitative differences between the manually analyzed data set below  $-15^{\circ}\text{C}$ , the main message of this manuscript remains: The occurrence of ice-containing surface-coupled cloud profiles at temperatures above  $-10^{\circ}\text{C}$  is much higher compared to surface-decoupled profiles.

We consider an implementation of the automatic ice detection algorithm introduced above as a promising approach for future studies. For the sake of compatibility to our previous studies (Kanitz et al., 2011) we however suggest to follow the original approach presented in the manuscript.

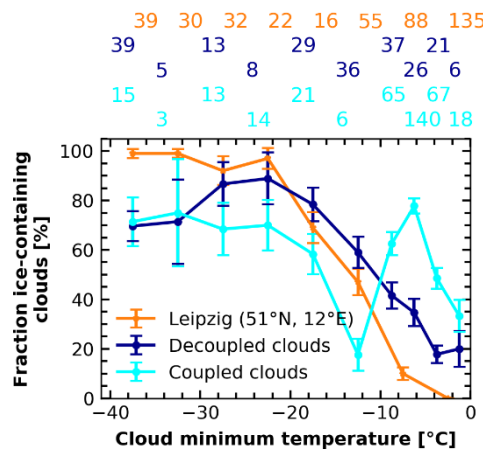

**Figure 1:** Fraction of ice-containing clouds determined using a volume depolarization threshold of 0.03. In dark blue the results for surface-decoupled clouds are shown and in cyan those for surface-coupled clouds. In orange results for Leipzig, Germany from Kanitz et al. (2011) are presented. The numbers above the plots represent the respective profile behind each data point.

*There is no mention to the uncertainties and assumptions done in the lidar data processing (use of lidar ratios, calibration of profiles, quantification of effects like specular reflection, etc ...) which are quite relevant for the presented statistics. Everything could be referred to a literature paper to clarify the data processing, but, as it stands, I am not able to find one reference for these aspect in the entire section, only one for the multiple scattering affecting the depolarization ratio.*

Similar to a comparable concern raised by reviewer 1 we agree that the issue of specular reflection is not discussed well enough in the manuscript. However, since this effect is most prominent for rather large dendrites, who form at a temperature of roughly -15°C, we think specular reflection has little influence on our findings where we found the strongest influence at a temperature above -10°C. We extended the Discussion section and elaborated the effect (see page 15, line 7 and the following).

*The authors uses “the cold side of the temperature inversion which is closest to the cloud-radar-derived cloud top height in the radiosonde data to defined the cloud-top temperature.” It is not clear to me how large is the difference in meter between cloud top derived from the radar and the height of the radiosonde in correspondence of the cloud-top temperature. May a large difference be the result of a collocation effect which is negligible or not?*

As suggested by reviewer1 we changed the terminology from “cloud-top temperature” to “minimum cloud temperature”. To derive the minimum cloud temperature we searched for the lowest temperature between liquid layer base and cloud top. This information has been added to the manuscript on page 8, line 18-19.

*In section 2.2, a scaling factor for the parameterization of DeMott et al. (2015) is derived from a single paper in literature, Gong et al. (2020), where filter samples from the Cape Verde Atmospheric Observatory were studied and INP active at temperatures above -10°C were found, which consists likely of biological material. This factor is assumed as a sort of “true” to estimate the INP concentration without any study on the sensitivity of the results to this assumption. The considered assumption may lead to large uncertainties in the retrieved INP profiles. The authors should not forget that the lidar*

*retrieval have already uncertainties and is based on assumptions the effect of which might be amplified by this further assumption in the parameterization of mineral dust.*

A comparable concern was raised by reviewer 1. We decided to remove the Section on the retrieval of the INPC together with the Figure of the INPC (Fig. 6b in the old manuscript). The low data basis makes sophisticated parametrization impossible. We tried to provide an estimate of a possible INP load but have to admit that the uncertainty of the presented approach is too large. Instead, we extended the discussion on the measured attenuated backscatter coefficient values, including the lack of parametrizations for INP in the Arctic (see page 14, line 1-16).

*3. Likewise It's unclear why the authors did not use the cloud radar measurements in the identification and filtering of cases with ice crystal precipitation. This is another points which can change the statistics collected in too subjective way, to my opinion, affecting the final results.*

As also pointed out by reviewer 1 the cloud radar Mira-35 is much more sensitive to ice detection as the lidar (the lidar has a detection threshold in IWC of about  $10^{-6} \text{ kg m}^{-3}$ , see Bühl et al. (2013)). Similar to our answer to reviewer 1, we like to point to the frequently observed low clouds during PS106 (see Griesche et al. (2020)) with a cloud base below the lowest detection range of the radar (155m above the instrument). In some cases, even the cloud top was below this height. These clouds would have been falsely classified using the cloud radar only, while these clouds are actually those closest to the surface and therefore most-likely coupled to it. Using the near-field capabilities of our polarization lidar Polly<sup>XT</sup> is thus a prerequisite for the presented coupling study. Another point is that we wanted to do a study that is comparable to previous studies, as the one of Kanitz et al (2011). Nevertheless, we created the same analysis of the ice-containing clouds for surface-coupled and –decoupled cases (see Fig. 2). As to be expected the amount of ice containing clouds increased, yet ice-containing surface-coupled profiles were both absolutely (i.e. the numbers of profiles) and relatively (i.e. the fraction of ice-containing clouds) more frequent. To conclude this point: we think that the challenges we would be facing including the cloud radar for the ice detection would have deformed the statistics by excluding the very near clouds, and would have made a comparison to other studies difficult. And last but not least, the observed effect (more surface-coupled ice-containing cloud profiles with a IWC down to  $10^{-6} \text{ kg m}^{-3}$ ) would not be affected by radar observations. We discussed this issue on page 15, line 1-6. Additionally the results are presented in Appendix A.

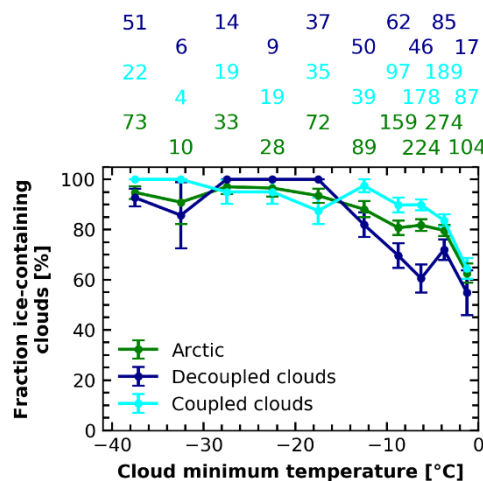

**Figure 2:** Fraction of ice-containing clouds determined using the cloud radar for ice detection. In green the results of the complete data set is shown, in cyan for the coupled clouds and in dark blue for the decoupled clouds.

*4. For the results shown in Figure 4, the reported statistics on the number of profiles considered in the statistics poses a questions on the dependence of the results from dataset time coverage: is the number*



*of coupled ice cloud profiles much higher because these are the most recurrent cases for the investigated period of the year? This aspect must be discussed in clear way, maybe using ancillary datasets.*

Previous studies have shown that the occurrence of low level and thus likely surface-coupled clouds in the Arctic have been highest in the northern hemisphere summer. Nevertheless these are also the clouds which are one of the greatest challenges for models (Morrison et al., 2012, <https://www.nature.com/articles/ngeo1332>). Hence, we strongly support the request to use longer time series, to study this observed effect in more detail.

### **Specific comments**

*Line 6 page 1: replace “in “ with “within”*

Done.

*Line 9 page 1: the factor mentioned here in in the range 2-5, but it is not mentioned in which temperature range assumes these values. It becomes clearer from the following sentence. Please rephrase.*

We specified the temperature range.

*Lines 14-16 page 1: this sentence is not appropriate for the abstract but for the discussion section, please remove.*

The paragraph has been reworded.

*Line 8 page 6: “to date” must be at the end of the sentence.*

Done.

*Line 8 page 2: “yet” date must be at the end of the sentence.*

Done.

*Line 24 page 3: remove higher at the beginning of the line and change “: : : than do: : :” with “higher than”.*

Reworded.

*Page 7: Figure caption please put “yet” at the end of the sentence of replace “an” with “a”.*

‘An’ replaced by ‘a’.

*Page 7 line 1: it is not clear to me which algorithm has been used to retrieve the cloud top height from the radar measurements, please specify.*

The cloud top has been derived by the highest cloud radar range gate, which was classified as cloud. The minimum detection threshold of the cloud radar was 5 times the signal to noise ratio in the co-channel. This information has been added to the manuscript (page 7, line 15-17).

*Page 7 line 13: the detection of cloud by the radar up to the tropopause maybe depending on the size of ice crystals and by the concurrent atmospheric attenuation. Please nuance this sentence.*

The sentence has been reworded.

*Page 7 line 17: please replace “simplified coupling algorithm” with “simplified version of the algorithm”.*

Done.

*Page 10 line 8, page 11 line 1-2: do you have any reference to support your arguments?*

Instead of adding a reference for this statement, we have weakened our statement.

*Page 12 line 1: “is the strongest” or “is stronger”?*

“is stronger”.

*Page 12 line 11-13: in this part of the manuscript, there is often the comparison with statistics collected in Leipzig; I am wondering if the authors can say a few words on the usage of data from one site only at the mid-latitudes to make the comparison with a more stable region like the Arctic.*

The reason for the comparison with the mid-latitude site of Leipzig is justified by the fact that we believe the free-tropospheric aerosol in the Arctic is dominated by continental long-range sources as is also the case for the free troposphere over Leipzig. This possibility has been discussed in more detail in the manuscript (page 14, line 17-25).

*Page 14 lines 14-19: in this paragraph, the reader can find the list of the limitation of the results presented in this study. These are highlighted only at the end of the manuscript as an outlook for future studies while they should be discussed also when the results are presented.*

The discussion has been completed by the respective points.

#### References:

Bühl, J., Ansmann, A., Seifert, P., Baars, H., and Engelmann, R. (2013), Toward a quantitative characterization of heterogeneous ice formation with lidar/radar: Comparison of CALIPSO/CloudSat with ground-based observations, *Geophys. Res. Lett.*, 40, 4404–4408, doi:[10.1002/grl.50792](https://doi.org/10.1002/grl.50792).

Gierens, R., Kneifel, S., Shupe, M. D., Ebell, K., Maturilli, M., and Löhnert, U.: Low-level mixed-phase clouds in a complex Arctic environment, *Atmospheric Chemistry and Physics*, 20, 3459–3481, <https://doi.org/10.5194/acp-20-3459-2020>, 2020.

Griesche, H. J., Seifert, P., Ansmann, A., Baars, H., Barrientos Velasco, C., Bühl, J., Engelmann, R., Radenz, M., Zhenping, Y., and Macke, A.: Application of the shipborne remote sensing supersite OCEANET for profiling of Arctic aerosols and clouds during *Polarstern* cruise PS106, *Atmos. Meas. Tech.*, 13, 5335–5358, <https://doi.org/10.5194/amt-13-5335-2020>, 2020.

Hinkley, E. D. (editor) (1976), "Laser Monitoring of the Atmosphere," Springer-Verlag, New York.

Hogan, R. J., Mittermaier, M. P., & Illingworth, A. J. (2006). The Retrieval of Ice Water Content from Radar Reflectivity Factor and Temperature and Its Use in Evaluating a Mesoscale Model, *Journal of Applied Meteorology and Climatology*, 45(2), 301-317

Jensen, M. P., Holdridge, D. J., Survo, P., Lehtinen, R., Baxter, S., Toto, T., and Johnson, K. L.: Comparison of Vaisala radiosondes RS41 and RS92 at the ARM Southern Great Plains site, *Atmospheric Measurement Techniques*, 9, 3115–3129, <https://doi.org/10.5194/amt-9-3115-2016>, 2016.

Kanitz, T., Seifert, P., Ansmann, A., Engelmann, R., Althausen, D., Casaccia, C., and Rohwer, E. G. (2011), Contrasting the impact of aerosols at northern and southern midlatitudes on heterogeneous ice formation, *Geophys. Res. Lett.*, 38, L17802, doi:[10.1029/2011GL048532](https://doi.org/10.1029/2011GL048532).

Seifert, P., Ansmann, A., Müller, D., Wandinger, U., Althausen, D., Heymsfield, A. J., Massie, S. T., and Schmitt, C. (2007), Cirrus optical properties observed with lidar, radiosonde, and satellite over the tropical Indian Ocean during the aerosol-polluted northeast and clean maritime southwest monsoon, *J. Geophys. Res.*, 112, D17205, doi:[10.1029/2006JD008352](https://doi.org/10.1029/2006JD008352).

# Contrasting ice formation in Arctic clouds: surface coupled vs decoupled clouds

Hannes J. Griesche<sup>1</sup>, Kevin Ohneiser<sup>1</sup>, Patric Seifert<sup>1</sup>, Albert Ansmann<sup>1</sup>, Ronny Engelmann<sup>1</sup>, and Martin Radenz<sup>1</sup>

<sup>1</sup>Leibniz Institute for Tropospheric Research (TROPOS), Leipzig, Germany

**Correspondence:** Hannes Jascha Griesche (griesche@tropos.de)

**Abstract.** In the Arctic summer of 2017 (~~June, 1st to July, 16th~~<sup>1 June to 16 July</sup>) measurements with the OCEANET-atmosphere facility were performed during the Polarstern cruise PS106. OCEANET comprises amongst other instruments the multiwave-length polarization lidar Polly<sup>XT</sup>~~-OCEANET, 35-GHz cloud radar of the OCEANET platform, and radiosonde measurements were conducted during cruise-~~ OCEANET and was for PS106 of the research vessel Polarstern around Svalbard complemented  
5 with a vertically pointed 35-GHz cloud radar. In the scope of the presented study, the influence of cloud height and surface coupling on the probability of clouds to contain and form ice is investigated. Polarimetric lidar data was used for the detection of the cloud base and the identification of the thermodynamic phase. Both radar, and lidar were used to detect cloud top. Radiosonde data was used to derive the thermodynamic structure of the atmosphere and the clouds. The analyzed data set shows a significant impact of the ~~surface-coupling~~ surface coupling state on the probability of ice formation. Surface-coupled  
10 clouds ~~, were~~ identified by a quasi-constant potential temperature profile from the surface up to liquid layer base, ~~in the same cloud-top temperature range contain ice.~~ Within the same minimum cloud temperature range ice-containing clouds have been observed more frequent than ~~decoupled-surface-decoupled~~ clouds by a factor of up to ~~5 for cloud-top 6~~ (temperature intervals between -7.5 and -5°C ~~(169 vs. 31 profiles, 164 vs. 27 analyzed intervals of 30 minutes).~~ The frequency of occurrence of surface-coupled ice-containing clouds was found to be 2-3 times higher (e.g. 82% vs. 35% between -7.5 and -5°C). These find-  
15 ings provide evidence that above -10°C heterogeneous ice formation in Arctic mixed-phase clouds occurs by a factor of ~~2-5~~ 2-6 more likely when the cloud layer is coupled to the surface. In turn, for ~~cloud-top~~ minimum cloud temperatures below -15°C, the frequency of ice-containing ~~cloud-profiles~~ clouds for coupled and decoupled conditions approached the respective curve for the Central-European site of Leipzig, Germany (51°N, 12°E). This provides further evidence that the free-tropospheric ice nucleating ~~partieles~~ particle (INP) reservoir over the Arctic is controlled by continental aerosol. ~~One possible explanation for the~~  
20 ~~observation is that turbulent mixing of the air below surface-coupled clouds allows~~ Two sensitivity studies, using also the cloud radar for detection of ice particles, ~~acting as seeds for ice multiplication, or marine aerosols, acting as INP, to be transported into the cloud layer more efficiently than in the case of decoupled conditions. This hypothesis is corroborated by and applying a modified coupling-state detection, both confirmed the findings, albeit with a lower magnitude. Possible explanations for the observations are discussed by considering~~ recent in-situ measurements of INP in the Arctic, of which much higher concentra-  
25 tions were found in the surface-coupled atmosphere in close vicinity to the ice shore. ~~Using lidar measurements we also found~~

evidence for enhanced INP number concentrations (INPC) within surface-coupled cloud-free air masses. The INPC have been estimated based on particle backscatter profiles, published freezing spectra of biogenic INP and existing parameterizations.

Copyright statement. TEXT

## 1 Introduction

5 The Arctic climate is known to change much faster compared to other regions on Earth, which is referred to as Arctic amplification (Serreze and Francis, 2006). The surface temperature anomaly of the Arctic for the year 2013 with respect to the mean of 1970–1999 is 2–3 K ~~above the one of the~~ warmer compared to the mid-latitudes (Francis and Skific, 2015). As is also pointed out by Francis and Skific (2015), this differential heating will likely have consequences for the mid-latitudinal circulation, leading to reduced zonal winds and consequently more-steady weather periods with accompanied larger regional  
10 risk of severe droughts or wet periods.

Given the possible widespread consequences of Arctic amplification, it is essential to understand the physical processes leading to this rapid change. A number of different atmospheric and marine processes are currently discussed as potential sources for Arctic amplification. Nevertheless, a clear causal chain could ~~to date~~ not be established (~~Serreze and Barry, 2011; Pithan and Mauritsen,~~ (Serreze and Barry, 2011; Pithan and Mauritsen, 2014; Kim et al., 2017) because the quantitative contribution of the single pro-  
15 cesses involved as well as their autocorrelation could ~~yet not be determined~~ not yet be determined to date. Besides the evident role of sea ice loss in the warming process, a key role in Arctic amplification is attributed to clouds (Vavrus, 2004). Kay and L'Ecuyer (2013) obtained a climatology of Arctic clouds and radiation conditions for the first decade of the 21st century. They highlight the importance of clouds in the Arctic climate system but they also note that both conditions - presence as well as absence of clouds - can contribute to Arctic amplification, depending on the season and the sea ice conditions. In 2016 the German  
20 transregio initiative ArctiC Amplification: Climate Relevant Atmospheric and SurfaCe Processes, and Feedback Mechanisms (AC)<sup>3</sup> was established to further investigate the reasons and consequences of Arctic amplification (Wendisch et al., 2019).

With respect to the microphysical properties of Arctic mixed-phase clouds, it is evident that an accurate representation of the latter in atmospheric models is important in order to understand and accurately simulate Arctic climate (Engström et al., 2014). Especially their longevity puts high demands on the research community. Big efforts were put into establishing model frame-  
25 works that are capable of simulating such cloud systems (~~Fridlind et al., 2007; Klein et al., 2009; van Diedenhoven et al., 2009; Morrison et al., 2011; Neggers et al., 2019)~~ (Fridlind et al., 2007; Klein et al., 2009; van Diedenhoven et al., 2009; Morrison et al., 2011; Neggers et al., 2019), even in the case of single-layer clouds of low complexity. The different processes involved to form and sustain supercooled liquid or mixed-phase clouds were thoroughly discussed by Morrison et al. (2012). Large-scale advection of water vapor is considered to be the prerequisite for formation and persistence of Arctic stratus decks, especially over closed ice surfaces.

30 In the marginal sea ice zone, the transition zone between closed ice surface and open sea, the importance of surface sources of heat and moisture in promoting cloud processes relative to in-cloud or advective sources is, however, uncertain (Harrington

and Olsson, 2001; Shupe et al., 2013). The subsequent microphysical evolution of the Arctic stratiform cloud decks is subject to the availability of cloud condensation nuclei (CCN) and ice nucleating particles (INP) (Stephens, 2005; Fridlind et al., 2007; Kalesse et al., 2016). At temperatures above -38°C only heterogeneous ice formation takes place, which requires the availability of such INP (Hoose and Möhler, 2012), with INP from different origin starting to be active at different temperatures. Mineral dust, e.g., starts getting active below a temperature of about -15°C (Hoose and Möhler, 2012) while sea spray aerosol INP have been found to be already active at -5°C (DeMott et al., 2016). INP from biological origin are assumed to be one of the most active ones at low to moderate supercooling (Schnell and Vali, 1976; Szyrmer and Zawadzki, 1997; Murray et al., 2012; O'Sullivan et al., 2018).

Many studies report that respective INP reservoirs for Arctic clouds are mainly provided by means of long-range transport from lower latitudes (Morrison et al., 2012). An increasing number of studies, however, suggest that also local aerosol sources can provide significant numbers of CCN and INP which stem from marine processes (~~Bigg, 1996; DeMott et al., 2016; Hartmann et al., 2020~~) (Bigg, 1996; DeMott et al., 2016; Hartmann et al., 2020) or even from ship emissions or industry (Creamean et al., 2018; Thomson et al., 2018). This suggests that also Arctic clouds are subject to anthropogenic climate change (Lohmann, 2017). Wex et al. (2019) found an annual cycle in INP number concentration (INPC) at four different-land based stations in the Arctic with the largest INPC in summer. Hartmann et al. (2020) analyzed filter measurements from an Arctic airborne campaign and found the highest INPC during low level flights above open leads and polynyas. Heat sensitivity of the sampled INP as well as high freezing onset hint towards biogenic origin. Low flight altitudes, a large number of open leads in the vicinity of the aircraft flight track, and detected sea salt in the aerosol samples suggest that these INP rather originate from local marine sources than long range transport.

One way of evaluating the relationship between temperature, aerosol conditions, and the efficiency of heterogeneous ice formation is the utilization of remote-sensing observations. From combined observations of cloud radar, lidar, and microwave radiometer, the vertical structure and microphysical composition of clouds and precipitation over a specific site can be obtained (~~Hillingworth et al., 2007; Shupe, 2007~~) (Hillingworth et al., 2007; Shupe, 2007). For vertically and optically thin cloud layers also the application of single systems such as polarization lidar can be used to obtain the required information (Sassen, 2005; Ansmann et al., 2009). Thermodynamic properties of the atmosphere are provided by soundings or model data. Numerous studies provide evidence that the occurrence and efficiency of heterogeneous ice formation at ambient conditions depends strongly on both, temperature (Shupe, 2011; Zhang et al., 2017) as well as the type and quantity of the aerosol burden at cloud level (Sassen, 2005; Seifert et al., 2010; Kanitz et al., 2011; Zhang et al., 2018).

With respect to the humidity conditions, such studies are even further constrained under the presence of layers of supercooled liquid water which is the case for the majority of cloud layers with top temperatures above -25°C (~~Ansmann et al., 2008; de Boer et al., 2011~~) (Ansmann et al., 2008; de Boer et al., 2011; Westbrook and Illingworth, 2011). Changing aerosol conditions in the Arctic have thus the potential to modify the general occurrence of heterogeneous ice formation and the cloud microphysics. This puts a definite requirement to advance the current understanding of the ~~current state of how~~ heterogeneous ice formation ~~occurs in the Arctic. First studies suggest that aerosols potentially influence the structure and microphysics of Arctic in Arctic~~ clouds.

Norgren et al. (2018) show that aerosols might be responsible for the reduction in the cloud ice content in low-level Arctic

mixed-phase clouds. They found that mixed-phase clouds present in a clean aerosol state have ~~higher~~ ice water content by a factor of 1.22 to 1.63 higher at cloud base than ~~do~~-similar clouds in cases with higher aerosol loading. Jouan et al. (2014) hypothesized that emissions of SO<sub>2</sub> may reduce the ice nucleating properties of INP through acidification, resulting in a smaller concentration of larger ice crystals that leads to an increase in precipitation.

5 Clouds in general are highly variable in their occurrence and structure (Stephens, 2005). ~~The main~~ A common feature of Arctic clouds is ~~,however,~~ associated to the frequent occurrence of multi-layer temperature and humidity inversions which lead to the formation of temporally stable multi-level mixed-phase cloud decks (Shupe et al., 2011; Morrison et al., 2012; Verlinde et al., 2013). ~~These~~ Yet, Arctic clouds also form commonly under stable conditions with turbulence initiation after persisting for several hours due to radiative cooling (Silber et al., 2020). The cloud layers are of complex macro- and microphysical  
10 structure and frequently occur at heights close to the ground which are not easily trackable. Liu et al. (2017) pointed out that space-borne remote-sensing techniques miss to detect 25 to 40% of the clouds below 500 m height and also underestimate the fraction of mixed-phase and ice clouds between the surface and 1000 m height. In turn, ground-based profiling studies from the Arctic, which rely on lidar and radar observations, usually provide reasonable data only at heights above 100 – 150 m above ground, as it is the case for the 35-GHz cloud radar (KAZR) of the U.S. Atmospheric Radiation Measurement (ARM) program  
15 of the Department of Energy (DOE) at the NSA (North Slope of Alaska) site in Utqiagvik (formerly known as Barrow), USA. Cloud processes that take place at lower heights can thus not thoroughly be characterized (Griesche et al., 2020).

Even though indications are given that local aerosol sources may play a role for heterogeneous ice formation, none of the studies available so far investigated any potential effects of the ~~surface-coupling~~ surface coupling state of Arctic clouds on the frequency and efficiency of ice formation. Investigation of potential effects of the surface coupling were so far restricted to  
20 bulk properties such as ice water path (IWP) or liquid water path (LWP), without referencing clearly to any relations between ice formation and temperature, or even aerosol conditions. Shupe et al. (2013) found only moderate differences in coupled versus decoupled clouds. They report that clouds which are thermodynamically linked with the surface tend to show colder temperature profiles within the cloud and slightly weaker in-cloud turbulence, yet often have higher LWP and IWP, for which they suggest as a reason the additional moisture supply from below. Qiu et al. (2015) studied the occurrence of Arctic mixed-  
25 phase clouds in relation to the presence and strength of humidity and temperature inversions but they did not provide any information about the overall frequency of ice formation in the different coupling states. Similar to Qiu et al. (2015), Qiu et al. (2018) used the opportunity to study the influence of both, surface conditions and different air masses, on thermodynamic variables and on the properties of Arctic mixed-phase clouds. Due to the coastal location of the Utqiagvik site in northern Alaska where the dataset for their study was obtained, marine air masses are transported by northerly winds, while more  
30 continental air masses are transported by southerly winds. Furthermore, the Arctic mixed-phase cloud occurrence frequency was found to have a positive ~~relationship~~ correlation with relative humidity with respect to ice and a negative relationship with stability. But also this study investigated mixed-phase cloud properties only. The efficiency of ice formation was not investigated. Sotiropoulou et al. (2014) provide a detailed study of the properties of coupled and decoupled Arctic clouds but found with respect to the thermodynamic phase partitioning, that the IWP and LWP as well as their ratio of coupled  
35 and decoupled clouds are similar. Gierens et al. (2020) studied ~~surface-coupling~~ surface coupling effects on mixed-phase



clouds based on a two year data set from ground-based remote-sensing in Ny-Ålesund, Svalbard. They found a seasonal cycle of the coupling-state, with most coupled clouds observed during summer. The LWP in coupled clouds was roughly 40% higher compared to decoupled clouds, but only minor differences have been found in IWP. Their findings are effected by the surrounding orography of the measurement site. Glacier outflows tend to be decoupled, while for clouds transported from the open sea towards Ny-Ålesund coupling was most common. The open sea west of Svalbard also might act as a local humidity and heat source. Furthermore, models have their difficulties to accurately reproduce heterogeneous ice formation in clouds. Nomokonova et al. (2019) reported in agreement with Sandvik et al. (2007) that single-layer mixed-phase clouds tend to be underestimated in models compared to results from the synergy of different ground-based instruments. Without considering any ~~surface-coupling~~ surface coupling effects in their study, they found in a temperature regime between -20 to -5°C a lower occurrence of mixed-phase clouds by the expense of pure ice clouds.

Given the indication that aerosols play a dominating role in the heterogeneous ice formation process and that Arctic clouds are frequently occurring either coupled or decoupled to the surface and corresponding local aerosol sources, it should be investigated if the characteristics of heterogeneous ice formation processes differ between coupled and decoupled clouds. The goal of this study is motivated by the need for an accurate characterization of the near-surface cloud properties and the prevalent indications that the microphysical and dynamical structure of surface-coupled Arctic clouds differs from those of decoupled clouds (Shupe et al., 2013; Qiu et al., 2015, 2018). The work is based on a comprehensive dataset of remote-sensing instruments and atmospheric soundings from an 8-week cruise of the research vessel Polarstern into the marginal ice zone between Greenland and Svalbard in May-July 2017 that was collected in the frame of (AC)<sup>3</sup>. By splitting this dataset into low- and high-altitude cloud layers as well as into coupled and decoupled clouds, an investigation of cloud macro- and microphysical properties will be possible separately for free-tropospheric clouds, not depending on regional effects and further aerosol input, and of surface-coupled clouds, being linked to local phenomena and aerosols in the Arctic region.

The article is structured as follows. Section 2 will focus on the instrumentation and methodology used to analyze the data from the ship cruise in the Arctic summer. In Section 3 an overview of the observations will be provided and statistical evaluation of the analyzed measurements of the Arctic clouds will be presented. A detailed discussion of the findings and the methodology is given in Sect. 4. Section 5 summarizes and concludes this study.

## 2 Instrumentation and Methodology

From 1 June until 16 July 2017 cruises PS106.1 and PS106.2 (PS106 in general, see Fig. 1) of the German research vessel (RV) Polarstern took place with the goal to conduct measurements in the marginal sea ice zone north and northeast of Svalbard (Macke and Flores, 2018). Cruise PS106.1 comprised the "Physical feedbacks of Arctic boundary layer, Sea ice, Cloud and Aerosol (PASCAL)" icebreaker expedition and ice floe camp, as well as the "Arctic CLOUD Observations Using airborne measurements during polar Day (ACLOUD)" aircraft campaign (Wendisch et al., 2019). PASCAL as well as ACLOUD were dedicated to the investigation of processes related to Arctic amplification. During the full period of PS106, continuous remote-sensing of aerosols and clouds was performed with the OCEANET platform aboard Polarstern (Griesche et al., 2020). The

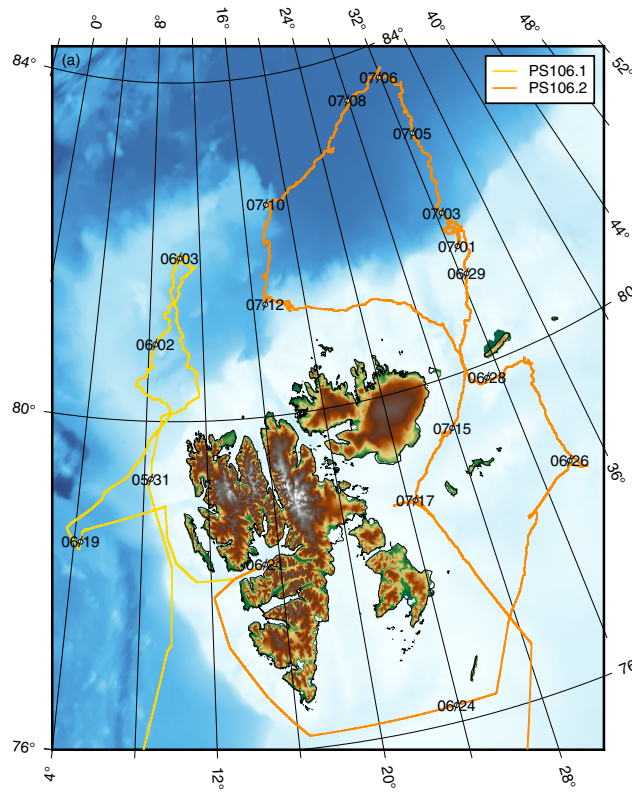

**Figure 1.** Cruise track of the PS106 campaign (with dates annotated at the track). The first leg (PS106.1 / PASCAL) is shown in yellow, the second leg (PS106.2) in orange. Figure taken from Griesche et al. (2020).

suite of instruments of OCEANET operated during PS106 is listed in Table 1. Of specific interest for the underlying study are the motion-stabilized vertically pointing 35-GHz cloud Doppler radar Mira-35 (Görsdorf et al., 2015; Griesche et al., 2020), the multiwavelength Raman polarization lidar Polly<sup>XT</sup> ~~Oceanet~~ OCEANET (hereafter referred to as Polly<sup>XT</sup>; Engelmann et al., 2016) and the microwave radiometer (MWR) HATPRO (Rose et al., 2005). Auxiliary data for the study was obtained from the regularly performed atmospheric soundings of type Vaisala ~~RS41~~ RS92-SGP which are available every 6th hour (UTC) of the day for the entire cruise.

The set of instruments deployed for this study is used to obtain information about cloud vertical extent, atmospheric thermodynamic state, phase partitioning, and ice and liquid microphysical properties. As mentioned in the introduction, the goal of this study is to investigate the phase partitioning of Arctic cloud systems with respect to their surface coupling. It was thus aspired to obtain similar statistics as it was presented before by, e.g., Ansmann et al. (2009), Seifert et al. (2010, 2015), and Kanitz et al. (2011). Kanitz et al. (2011) showed that the relationship of spatially and vertically distinct ice-containing cloud layers and cloud top temperature varies strongly by region on Earth. For the current study, however, the cloud classification procedure that was applied by Kanitz et al. (2011) or similar ones such as of Seifert et al. (2010, 2015), was extended in such a

**Table 1.** Instrumentation used in the frame of this study.

| <b>Platform</b>               |                                                                     |                                                                                                                                                     |                      |
|-------------------------------|---------------------------------------------------------------------|-----------------------------------------------------------------------------------------------------------------------------------------------------|----------------------|
| Instrument                    | Type                                                                | Atmospheric parameters                                                                                                                              | Resolution           |
| <b>OCEANET</b>                |                                                                     |                                                                                                                                                     |                      |
| Polly <sup>XT</sup>           | Multiwavelength Raman polarization lidar, pointed 5° off-zenith     | Particle backscatter and extinction coefficient; linear depolarization ratio; water vapour mixing ratio                                             | 7.5 m;<br>30 s       |
| Mira-35                       | 35-GHz (Ka-band) motion stabilized, vertically pointing cloud radar | Vertical structure, boundaries and vertical-velocity dynamics of clouds and precipitation; contributes to cloud liquid water and ice water profiles | 30 m;<br>3 s         |
| HATPRO-G2                     | 14-channel microwave radiometer                                     | Estimated profiles of temperature and humidity; integrated water vapor and liquid water path                                                        | 100 – 1000 m;<br>1 s |
| <b>Polarstern Meteorology</b> |                                                                     |                                                                                                                                                     |                      |
| RS92-SGP                      | Radiosonde                                                          | Atmospheric pressure, temperature, humidity, wind vector                                                                                            | 1 s                  |

way that it accounts for the long-lasting nature of Arctic cloud systems which frequently prevented the classification of distinct, vertically and temporally separated cloud layers. Hence, we now present the applied method for this data set.

## 2.1 Ice-containing cloud analysis

- 5 The applied procedure to identify and characterize ~~the individual cloud profiles~~ individual clouds is illustrated in Fig. 2. Initially, the dataset is split into time intervals of 30~~minutes. Using the~~ minutes. The subsequent analysis is based on the respective 30 minute data portions of lidar attenuated backscatter coefficient and volume depolarization ratio at 532 nm wavelength, of radar reflectivity factor Z as well as of the temporally closest radiosonde ascent.

- 10 The base of the liquid-dominated layer (hereafter referred to as liquid layer) was determined using the attenuated backscatter coefficient as observed with the 532 nm near-field channel of Polly<sup>XT</sup>. Data from this channel is required in order to be able to determine the base of even the lowest clouds which can be as low as 50 m above the surface (Griesche et al., 2020). The minimum base height of each liquid layer detected in a 30 minute interval was identified using the attenuation approach. Each 7.5 m range gate of each 30 s lidar profile within the 30 min interval was checked for a decrease of the 532 nm ~~depolarization ratio (Fig. 3 (a)) the cloud phase was determined~~ attenuated backscatter coefficient by at least a factor of 10 within 250 m
- 15 vertical distance. Such a signal drop can only be caused by liquid clouds. The liquid layer base of each 30 s lidar profile is then set to the height, where the gradient first time reached 0.25 of the maximum gradient within these 250 m. This approach is similar to the one used within Cloudnet (Illingworth et al., 2007), but by omitting a distinct threshold of the attenuated backscatter coefficient, as overlap effects in the near-field prevented a thorough calibration of the latter at heights below 120 m

(Engelmann et al., 2016). The lowest liquid layer base in the 30 minute period was then assigned as the liquid layer base height of the respective interval.

If applicable the cloud top height was determined using the cloud radar observations. The highest, consecutive cloud radar pixel connected temporally (within the 30 minute interval) and spatially to the liquid layer base was set as cloud top (the minimum signal detection threshold level of the radar to detect a cloud pixel is 5 times the signal-to-noise ratio detected in the co-channel of the cloud radar). In the case of clouds below the lowest detection limit of the cloud radar the cloud top was determined using the lidar observations, respectively. Finally, the 30 minute interval was screened for the presence of ice virga below the liquid layer base by means of the Polly<sup>XT</sup> 532 nm volume depolarization ratio. Based on theoretical considerations a general quantification of the lidar 532 nm volume depolarization ratio for ice detection was made with the conclusion that a volume depolarization ratio of  $>0.03$  can be interpreted as ice occurrence (note that the molecular depolarization for the Polly<sup>XT</sup> 532 nm channel is  $\sim 0.005$ ).

In Fig. 2 (a) a simplified profile of the depolarization ratio is shown ~~with an aerosol layer and a cloud in the background. Aerosols can increase the depolarization depending on their shape. Also ice in case of a cloud present above the lidar. Ice particles show an enhanced depolarization ratio due to their crystal shape. Liquid droplets on the other hand have non-spherical~~ crystal shape as can be seen in the first profile in the ice virga below the liquid layer. The signal from the liquid layer is dominated by the return of the cloud droplets (even though a few ice crystals would be present), as the lidar is more sensitive to the larger number of the droplets. The liquid droplets produce a very low depolarization ratio due to their rather spherical shape. Within the liquid layer, however, the depolarization ratio increases ~~strongly linearly~~ due to multiple scattering (Jimenez et al., 2020). The following classification was applied in the frame of the inspection of each individual ~~profile 30 minute period:~~ A depolarization ratio close to 0 accompanied ~~with by~~ a strong lidar backscatter indicates the presence of spherical liquid-water droplets. If the depolarization ratio below the liquid layer is ~~very~~ high (likely due to ice crystals falling out of the cloud) the cloud is classified as an ice-containing cloud (15-16 UTC and 17-18 UTC in Fig. 3). Otherwise, it is classified as a liquid cloud (16-17 UTC and 18-21 UTC in Fig. 3). ~~In the presence of ice the liquid layer base height (dashed gray line in Fig. 2, gray bars in Fig. 3) is defined as the transition region in which the depolarization ratio is higher and reduces sharply with increasing height (transition region between ice particle scattering to cloud droplet scattering). In the absence of ice crystals it is the region where the lidar backscatter increases strongly with height. The cloud top height cannot be determined with lidar for optically thick clouds because of the attenuation of the signal, which was frequently the case for the Arctic clouds which are subject of this study. In this case the cloud radar measurements are used (Fig. 3 (b)). The height in which the signal decreases sharply is defined as the cloud top height (marked in red bars Fig. 3 (b)).~~

The ~~cloud-top minimum cloud~~ temperature is an important parameter in the sense of this study ~~-, as~~ INP efficiency increases by about an order of magnitude every 5 K (DeMott et al., 2015). Hence, the probability of ice production is highest ~~at the cloud top where usually the coldest temperature is reached within the cloud. The cloud-top temperature was obtained from the radiosondes including the knowledge of the cloud radar-derived approximate cloud top height. In theory the in the cloud where the temperature is lowest. Especially in the Arctic, where temperature inversions at cloud top are frequent, special care must be taken in determining the actual cloud minimum temperature. Using the temperature at the identified cloud top height should~~

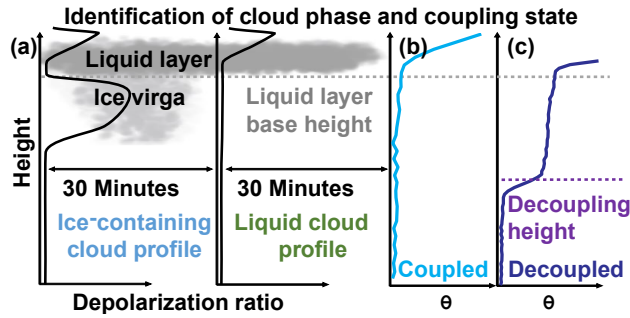

**Figure 2.** Sketch of the applied method: panel (a) illustrates a cloud above an aerosol layer with the according profile shows two example profiles of the lidar volume depolarization ratio. In the first profile an ice virga is present below a liquid layer. Due to the ice virga below the cloud-liquid layer (high depolarization) the first 30 minutes are classified as ice-an ice-containing cloud profile. Without ice falling out of the cloud only the liquid layer is present (low depolarization below the liquid layer). In the presence of ice the liquid layer base height is characterized by a strong decrease in depolarization as the signal is now dominated by the return of the liquid droplets. Within the liquid layer the depolarization increases again due to multiple scattering. In panel (b) and (c) two profiles of  $\theta$  are depicted, with (b) illustrating a coupled cloud and (c) a decoupled cloud. In (c) additionally the decoupling height is marked.

be equal to the height of the cold side of a temperature inversion as convection is very weak in the Arctic and is stopped at an inversion. Therefore, the cold side of the temperature inversion which is closest to the cloud-radar-derived cloud top height in the radiosonde data is searched for and is defined as the cloud top might produce a bias toward positive temperatures because the likelihood to select a temperature from within or above the temperature inversion is high when using the highest detected cloud pixel. The approach was thus to assign the minimum temperature between cloud base and top as the minimum cloud temperature.

Cloud layers, which may be affected from a cloud layer above have been by overlaying hydrometeors were filtered from the data set. Ice-crystal-precipitation-Precipitation from the upper layer may act as ice nuclei in the lower one (Vassel et al., 2019). The analyzed data set is corrected for this possible seeding effect based on cloud radar observations, which fully detect all can detect clouds up to the tropopause, depending on their size and the concurrent atmospheric attenuation. Though, dealing with rather low amounts of liquid water, the attributed attenuation effects on the cloud radar can likely be neglected. Cloud layers which are vertically closer than 1000 m to the subjacent cloud are thought to be able to influence the lower one and thus these periods have been excluded from the analysis.

### 2.1.1 Surface coupling state

The surface coupling state of the cloud is derived from the thermodynamic profiles of the radiosondes. Following Gierens et al. (2020), who introduced a simplified version of the coupling algorithm from Sotiropoulou et al. (2014), we examined the profile of the potential temperature  $\theta$  starting at liquid layer base down to the surface. If the difference between the cumulative mean of  $\theta$  and  $\theta$  exceeds exceeded 0.5 K the cloud is considered as decoupled (Fig 2 (c)) and this height is taken as the decoupling

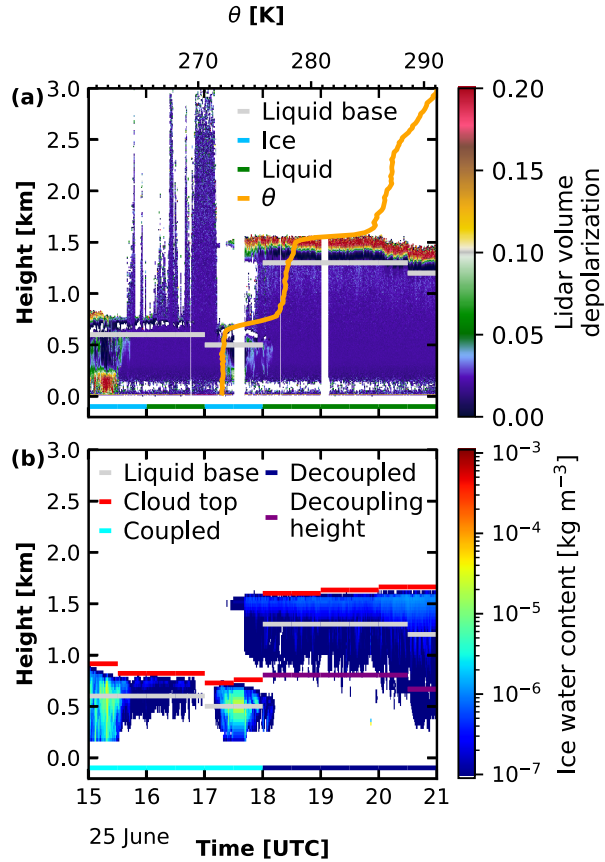

**Figure 3.** An example of the applied method on 25 June 2017 between 15–21 UTC. In (a) the lidar volume depolarization is shown. Marked are also flags for liquid layer base height (grey) and cloud phase (ice: blue, liquid: green). Additionally the  $\theta$  profile for the sounding launched at 17:15 UTC (orange) is plotted. In (b) the cloud radar reflectivity is depicted, together with information on the liquid base height (grey), cloud top height (red), the coupling state (cyan: coupled, dark blue: decoupled) and (if applicable) the decoupling height (purple).

height (marked in purple in Fig 2 (c) and Fig. 3 (b)). A quasi-constant  $\theta$ -profile on the other hand identifies coupled clouds (Fig 2 (b)). In Fig. 3 (a) the base of the clouds between 15–17 UTC were too low to be decoupled (500–600 m). The  $\theta$ -profile was nearly constant until base height. From 17 UTC on, however, the liquid base height is significantly higher (1200–1300 m) and due to the increase in  $\theta$  at roughly 700 m these clouds are defined as decoupled.

## 5 2.2 INP properties from lidar observations

As discussed in the introduction, recent studies suggest that local marine sources may significantly contribute to the INP reservoir in the Arctic, especially in the marginal ice zone. To further constrain whether the observed clouds during PS106 were influenced by such local sources we made use of cloud-free Polly<sup>XT</sup> particle backscatter profiles (Baars et al., 2016).



These profiles have been normalized by their decoupling height. To retrieve the decoupling height for cloud-free situations the above introduced surface-coupling algorithm was applied for each level of the radiosonde, starting at the surface. The lowest height where the decoupling criteria was fulfilled was set as decoupling height.

Mamouri and Ansmann (2016) introduced a retrieval for INP from lidar particle backscatter profiles. They applied the method to existing parameterizations, e.g., for desert dust (Niemand et al., 2012; DeMott et al., 2015; Ullrich et al., 2017), sea salt (DeMott et al., 2016), and continental aerosol (DeMott et al., 2010). Other studies suggested that INP active at temperatures above  $-10^{\circ}\text{C}$  in the Arctic are of biogenic origin. Hence the existing parameterizations have to be adjusted in a way to obtain an estimate of such INP. Gong et al. (2020) studied filter samples from the Cape Verde Atmospheric Observatory. They found INP active at temperatures above  $-10^{\circ}\text{C}$  which consists likely of biological material. In their supplementary material they published freezing spectra of biological INP prior and after heating. The heating process significantly reduced the ice nucleating ability of the samples. After heating the freezing onset was reduced from  $-7$  to  $-11^{\circ}\text{C}$  with a factor of 50 to 60 less INP. The resulting freezing spectrum after the heating procedure is comparable to those from mineral dust sources. Welti et al. (2018) for example analyzed filter samples also from Cabo Verde and assigned INP active below  $-12^{\circ}\text{C}$  to air masses originating from the Sahara. The freezing behavior of the corresponding INP is similar to those of the heated samples from Gong et al. (2020). Hence in order to estimate the number concentration of INP at  $-10^{\circ}\text{C}$  we applied a scaling factor of 50 to the parameterization of mineral dust from DeMott et al. (2015) to retrieve an estimate of the biogenic INP number concentration.

### 3 Results

#### 3.1 Campaign overview

The investigated period covers ~~1548–1520~~ of analyzed intervals of 30 minutes. In ~~87% of the time~~ 88% of these periods a cloud was identified and roughly 56.57% of the investigated clouds were identified as ice clouds. Approximately 64.62% of the analyzed clouds were coupled to the surface whereas 39.38% were decoupled. 61.64% of the ~~surface-coupled~~ surface-coupled clouds were defined as ice-containing clouds but only 48.47% of the decoupled clouds.

#### 3.2 Influence of surface coupling

Following Kanitz et al. (2011) we analyzed the fraction of ice-containing clouds with respect to all observed clouds in different ~~cloud-top-temperature-intervals~~ intervals of minimum cloud temperature in the range of heterogeneous freezing, starting at  $-40$  up to  $0^{\circ}\text{C}$  ~~down to below  $-40^{\circ}\text{C}$~~ . Figure 4 (a) shows the fraction of ice-containing clouds as a function of ~~cloud-top~~ minimum cloud temperature for the Arctic (bluegreen) in contrast to findings from Leipzig (orange; Kanitz et al., 2011). ~~Basically any cloud from both data sets with a top temperature  $< -25^{\circ}\text{C}$~~  Below a minimum cloud temperature of  $-25^{\circ}\text{C}$  most clouds from both data sets contained ice. In warmer clouds (~~cloud-top-temperature  $> -10^{\circ}\text{C}$~~  minimum cloud temperature  $> -10^{\circ}\text{C}$ ) above Leipzig on the other hand usually little to no ice-containing clouds were found. For the Arctic we found a different pattern in this temperature regime. Temperatures slightly below freezing are already sufficient for ice production: Up to 70% of the

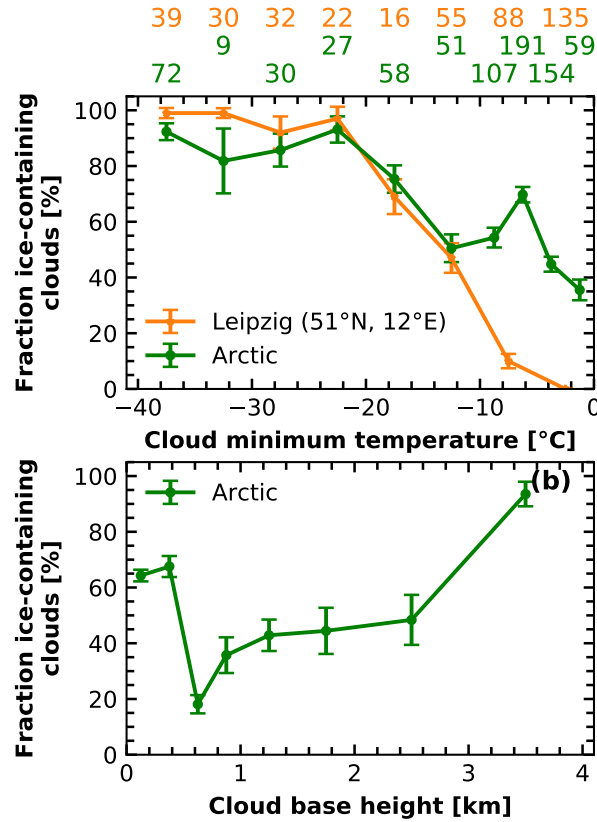

**Figure 4.** (a) Fraction of ice-containing clouds as a function of cloud-top minimum cloud temperature for within the heterogeneous ice nucleation regime. Data of all clouds of the Arctic 2017 field campaign is plotted-plotted in bluegreen. In orange the result-results for Leipzig from FigureFig. 3 in Kanitz et al. (2011) is shown. The error bars show the statistical uncertainty as in Seifert et al. (2010). Temperature intervals increase with decreasing cloud-top minimum cloud temperature due to decreased number of data ( $\Delta T = 2.5^\circ\text{C}$  below-above  $-10^\circ\text{C}$  and  $5^\circ\text{C}$  above-below  $-10^\circ\text{C}$ ). The numbers on top of the plot show the number of data for each temperature interval and the data points have been placed in the middle of the respective investigated interval. (b) Fraction of ice-containing clouds for different liquid layer base heights. Base height intervals increase with increasing liquid layer base height due to decreased number of data ( $\Delta h = 0.25$  km below 1 km, 0.5 km between 1 and 2 km and 1 km above 2 km).

investigated clouds with cloud-top minimum cloud temperatures above  $-15^\circ\text{C}$  showed signals of ice. As warmer cloud-top minimum cloud temperatures are usually associated with lower cloud heights, in a next step we analyzed the data set in terms of liquid layer base height.

Figure 4 (b) represents the fraction of ice-containing clouds as a function of liquid layer base heights (see Fig. 2) between 50 and 4000 m. In general there is a tendency of increasing fraction of ice-containing clouds with increasing base height. An increase of liquid layer base height usually-is-attended-by-may be associated with an increase of cloud top height, which-in-turn

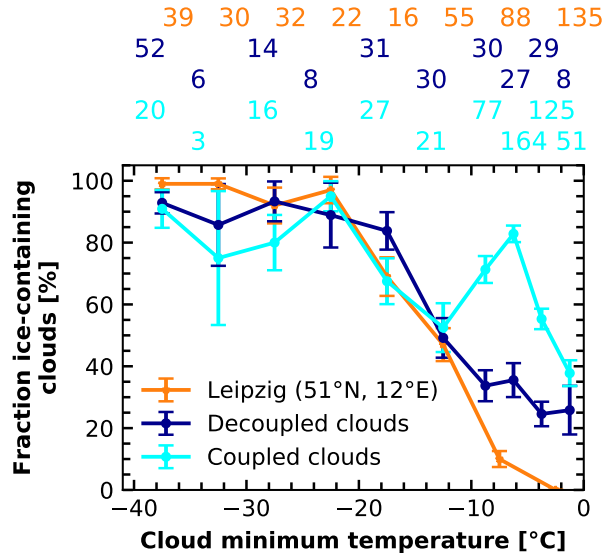

**Figure 5.** Same as Fig. 4 (a) with the Arctic clouds separated by their coupling state (cyan: coupled clouds, dark blue: decoupled clouds).

typically goes depending on the cloud vertical extent. A higher cloud top height in turn goes typically along with a decrease of cloud-top minimum cloud temperature. This leads to a higher probability of ice formation, as a higher fraction of more aerosols can act as possible INP. The fraction of ice-containing clouds for liquid layer base heights below 500 m, however, is also up to 70%. To further investigate if this effect may be linked to a possible INP source at the surface we separated the data set by the surface coupling state of the clouds, as described in Sect. 2. The resulting distribution for both surface-coupled-surface-coupled (cyan) and decoupled-decoupled clouds (dark blue) is shown in Fig. 5. Between -15 and 0°C strong coupling effects can be seen. Surface-coupled ice-containing cloud profiles-intervals compared to decoupled ones occurred more frequent by a factor of 2-5-2-6 (e.g. 169 vs. 31 profiles 164 vs. 27 between -7.5 and -5°C cloud-top minimum cloud temperature). Their frequency of occurrence was up to 80% and more than twice as high -as compared to decoupled clouds, as it is the case between -5 and -10°C. Below -15°C this effect vanished and both curves showed show a similar distribution as found over Leipzig. Investigating colder cloud-top temperatures the cases of surface-coupled clouds reduce significantly lower minimum cloud temperature the number of cases of surface-coupled clouds reduces.

## 4 Discussion

### 4.1 Possible effects for an increase of ice occurrence

The separation of the Arctic cloud data set revealed the presence of surface effects on the enhancement of the occurrence of ice formation. At greater heights, lower temperatures or in the case of uncoupled clouds, however, the ice frequency statistics are similar to what is observed over northern-hemisphere midlatitude sites- northern-hemisphere mid-latitude sites.

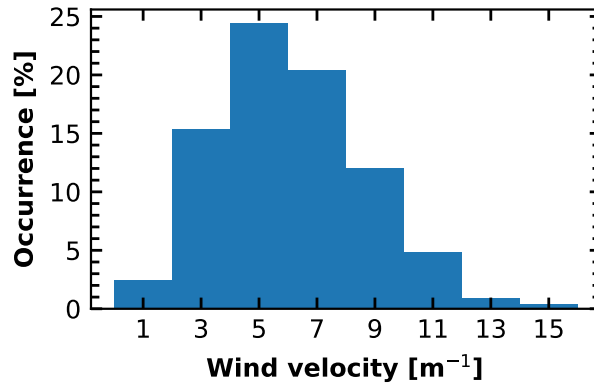

**Figure 6.** Histogram of the mean surface wind for any of the analyzed 30-min time interval.

The reasons for the increase in ice forming efficiency for low and coupled clouds in the Arctic ~~must be~~ is most likely caused by effects resulting from the linkage to the surface (Solomon et al., 2014). A surface coupling of the cloud is accompanied with a well-mixed layer from the surface up to liquid layer base. Multiple processes were discussed in previous studies as potential candidates for explaining the observations. They will be listed and examined below.

- 5 In Shupe (2011) the main reason for clouds to contain ice was expected to be near-surface diamond dust. As this effect is ~~strongest~~ stronger in winter and close to land (Intrieri and Shupe, 2004), it can be neglected as a dominating reason for the Arctic clouds during the investigated Polarstern cruise.

- 10 ~~Also~~ An enhanced fraction of ice-containing clouds could be attributed to blowing snow, as on the one hand, the lifted snow can be interpreted by the lidar as ice cloud. On the other hand blowing snow particles can act as seeds for ice crystals via the secondary ice multiplication processes (Rogers and Vali, 1987). Yet, an influence of blowing snow on the results can be ruled out. As Serreze and Barry (2014) pointed out, a minimum wind speed of  $15 \text{ ms}^{-1}$  is needed to lift the snow even for few meters above the ground. Since the wind speed during the PS106 campaign did not even reach this threshold (see Fig. 6), we are confident that blowing snow did not affect our findings. To consider also possible seeding effects from precipitating clouds above as found in Vassel et al. (2019), the data set has been filtered for those ~~(during this cruise anyway rare)~~ situations with
- 15 little to no effects on the results.

- 20 A further potential explanation is, that marine aerosol from areas of open water within the marginal sea ice zone or from open leads or polynyas may be mixed into the coupled cloud layers where they can act as ice nuclei (Burrows et al., 2013) and increase the probability of ice production. ~~Decoupling then again indicates a separation of the air masses due an inversion below liquid base. However, decoupled clouds observed above RV Polarstern may have been coupled to the surface prior approaching the measurement site. This could be an explanation why decoupled clouds still show a slightly enhanced fraction of ice-containing clouds, e.g., compared to clouds observed above Leipzig.~~ The origin of such highly active INP needed for such an effect is still under discussion in literature. Wex et al. (2019) found the largest INPC in the Arctic in summer with INP being active for temperatures up to  $-5^{\circ}\text{C}$ . Hartmann et al. (2020) suggested these INP may be of biogenic origin from local

marine sources such as open leads or polynyas. In an attempt to narrow down possible sources for marine INP in the Arctic, Ickes et al. (2020) compared the ice nucleation ability of Arctic sea surface micro layer samples and two different predominant Arctic phytoplankton species. Even though these samples showed ice nucleating activity already under moderate supercooling conditions, no clear evidence was found that they may serve as local marine INP source. Decoupling then again indicates a separation of the cloud from the surface due a stable layer below liquid base. Decoupled clouds, however, show also slightly enhanced fraction of ice-containing clouds, e.g., compared to clouds observed above Leipzig. We do not know the life cycle of the cloud and its thermodynamic prior the observation. Hence, assumptions about the reasons behind this observation would be speculative.

To examine potential enhancement of aerosol effects on the surface-coupled clouds, we performed a lidar-based aerosol analysis for PS106. Figure 7 (a) shows profiles of the particle backscatter coefficient at 532 nm wavelength for 8-9 different time periods adjacent to cloud observations, when Polly<sup>XT</sup> was able to probe cloud free air masses. The y-axis was normalized to the respective decoupling height of each individual profile. A reduction in the backscatter coefficient  $\beta$  above the decoupling height can be seen. ~~Following the procedure presented in Sec. ??, Fig~~ The sharp increase visible in some of the profiles is due to the liquid layer base, where the backscattered signal strongly increases. From the backscatter coefficient the lidar extinction coefficients can be estimated by using a lidar ratio of 50 sr for non-marine aerosol (Müller et al., 2007; Tesche et al., 2009; Groß et al., 2011). The extinction coefficient resulting from the profiles presented in Fig. 7 (b) presents the INPC derived from the  $\beta$  profiles for biogenic sources at -10°. Similar as for  $\beta$ , higher values below than above the decoupling height have been found for are much smaller compared to typical values for marine aerosol (40-100 Mm<sup>-1</sup>; Kanitz et al., 2013; Bohlmann et al., 2018), except for the two profiles on 27 June 2017 (note that a typical lidar ratio for marine aerosol is <50 sr (Groß et al., 2011; Bohlmann et al., 2018) and would result in even smaller extinction coefficient values). Aeronet photometer measurements at Arctic sites show values for the Ångström exponent (440–870 nm) around 1.5 (not shown) indicating a fine-mode-dominated aerosol distribution. The Ångström exponent for typically coarse-mode-dominated marine aerosol centers around 0.5 (Smirnov et al., 2009; Yin et al., 2019). Both, the small values of extinction coefficient combined with the high Ångström exponents are clear indications that the observed aerosol is not of typical marine origin. Yet, an estimation of the INPC from the INPC for all six cases, lidar measurements, as presented by Mamouri and Ansmann (2016) for different aerosol types is not possible, because the respective parameterizations for such biogenic aerosol in the Arctic is still missing.

For both coupling states at a minimum cloud temperature below -15°C the occurrence of ice-containing clouds is similar as found over Leipzig. To provide further insights on this matter we performed an air mass source analysis based on FLEXPART (Pisso et al., 2019), as introduced by Radenz et al. (2020). Throughout the analyzed period (1 nm from Polly<sup>XT</sup> and (b) the derived estimate June - 16 July 2017) particles were traced for 10 days, starting every 3 hours with height steps of 500 m. The relative residence time of the particles below a reception height of INPC 2 km above different possible aerosol source areas has been calculated and is shown in Fig. 8. A strong decrease of water as possible source region for aerosols for particles arriving above 2 km is obvious, while snow/ice (note these are land based ice shields and glaciers, not the frozen Arctic ocean), savanna/shrubland, grass/cropland and forest increase. Hence, we conclude that the free tropospheric aerosol load in the Arctic during PS106 was rather similar as for a continental site like Leipzig. The date-

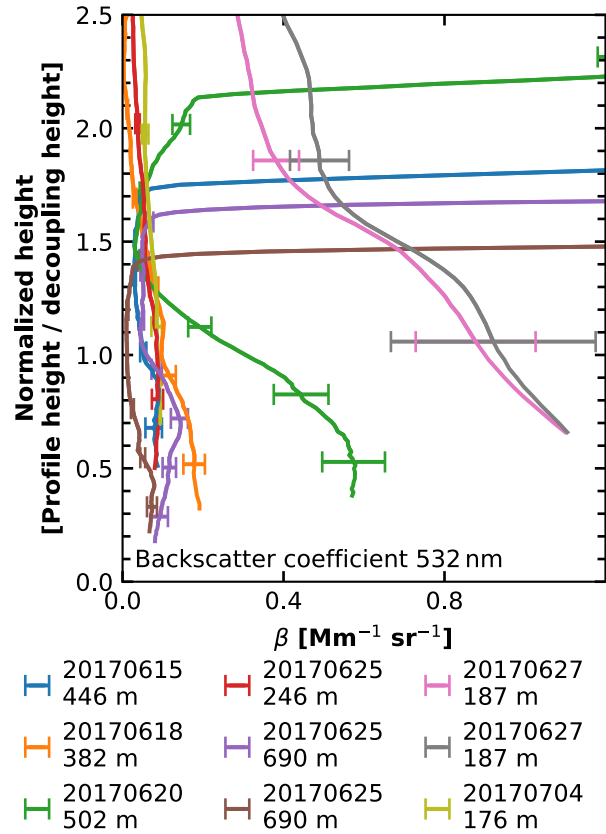

(a) Profiles of particle backscatter coefficient at 532

**Figure 7.** (a) Profiles of particle backscatter coefficient at 532 nm from Polly<sup>XT</sup>. The date of the corresponding profiles together with the respective decoupling height are annotated below.

The presented results are based on a two month campaign. And even though strong evidence was found that the effect is a consequence of aerosol of marine origin acting as INP in the cloud this rather short time coverage obviously can not cover all situations which are of interest in this matter. The influence of the distance to open water surfaces such as the open sea or leads and polynyas as well as a possible seasonal effect could not be studied.

#### 5 4.2 Methodology and instrument effects

As this study is one of the first to provide insights on the presented matter and as it has some limitations besides the temporal and spatial coverage, a general discussion of the methodology and possible instrument effects on the ice detection and the determination of the coupling state is also given here.

Despite having a much more ice-sensitive Mira-35 cloud radar available, we used the lidar for the ice detection. The reason behind this is the frequent occurrence of low-level clouds below the lowest detection limit of the cloud radar (155 m above



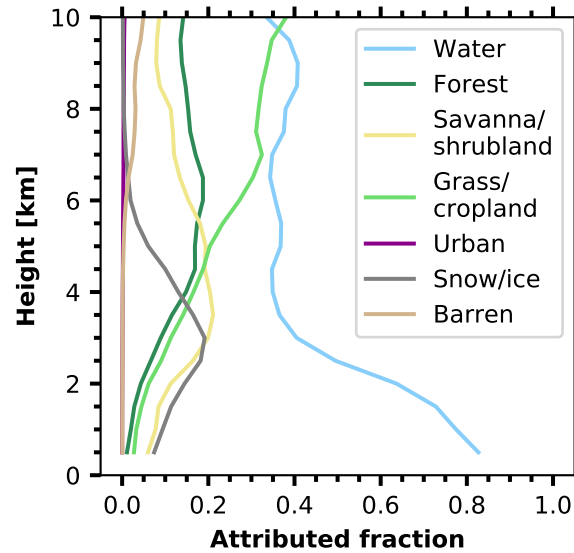

**Figure 8.** Fraction of residence time below the corresponding profiles is given in perception height (b2 km) together with the respective decoupling height above different possible aerosol source regions based on FELXPART analysis.

the instrument). Such clouds were frequently observed during PS106 (25% of the observational time; Griesche et al., 2020) and hence a cloud-radar-based statistics would be biased towards higher-level clouds. Nevertheless a statistic based on the available cloud radar observations is shown in Appendix A. Quantitative differences are obvious compared to Fig. 5 but the effect of a larger fraction of ice containing clouds in the case of surface-coupling is still visible.

- 5     Oriented ice crystals can have a strong effect on the observed lidar signal. In the case of large, horizontally oriented plate crystals and a zenith-looking lidar the measured backscatter strongly increase while the depolarization ratio close to zero (e.g. Noel and Sassen, 2005; Westbrook et al., 2010), the so-called specular reflection. Hence, most ground-based lidars are tilted off-zenith by a few degrees, in the case of Polly-XT by 5°. This avoids most of the specular reflection effects, which otherwise may mask the presence of ice (Noel et al., 2002). Yet, Silber et al. (2018) showed that the effects are still visible
- 10    up to an off-zenith angle of 10° in the case of planar ice crystals. Sassen and Takano (2000) found in case of the rare event of oriented columns for an off-zenith angle 1-2° strong depolarization effects. However, to date it has not been shown, how random oriented columnar ice crystals, as they form above -10°C, the temperature regime where we found the strongest effect of surface coupling, influence the lidar signal at varying zenith angles. According to Noel et al. (2004), columnar crystals with high axis ratio can be expected to have high particle depolarization ratios on the order of 0.5.
- 15    The coupling approach has its limitations, as the height dimension is not considered and thus a larger fraction of lower clouds might be classified as surface-coupled. Therefore, the coupling retrieval was tested by setting a maximum potential temperature gradient between the surface and the liquid layer base for the surface-coupled state. Only these cloud profiles, where beside the

original coupling requirement also the gradient between surface and liquid layer base was below a threshold of  $2 \text{ K km}^{-1}$ , were considered as surface-coupled (see Appendix B). While using such a threshold the number of surface-decoupled cloud profiles increase at the expense of surface-coupled ones. Yet, the observed surface coupling effect on the ice occurrence remains. In Appendix B we also discuss a possible influence of the radiosonde measurement uncertainty on the surface coupling retrieval, which we have not considered otherwise in our analysis.

## 5 Summary & Conclusions

In this study, differences in the fraction of ice-containing clouds for surface-coupled and decoupled clouds were investigated. In order to do so, lidar, cloud radar, and radiosonde observations from the RV Polarstern cruise PS106 around Svalbard in the Arctic summer 2017 were analyzed. Beside ~~cloud-top~~ minimum cloud temperature, the data show a significant dependence from-of the liquid layer base height and coupling state of the cloud on the probability of ice formation. Figure 5 compares the fraction of ice-containing clouds for different ~~cloud-top~~ minimum cloud temperatures for coupled and decoupled clouds. Strongest differences have been found at ~~cloud-top~~ minimum cloud temperatures slightly below freezing. Above  $-15^\circ\text{C}$  ~~coupled clouds contain ice~~  $-15^\circ\text{C}$  surface-coupled ice-containing clouds occur more frequent by a factor of up to 5-6. Furthermore, the number of analyzed data is largest in this range, which underlines the significance of this statement. A similar ice cloud occurrence below  $-15^\circ\text{C}$  as found over Leipzig together with a rather land-based dominated aerosol source attribution hint towards the presence of continental aerosol in the free troposphere.

In the frame of our study, we examined the potential reasons for the ~~surface-coupling~~ surface coupling effects by means of a literature survey. However, seeding from higher ice clouds, as well as from blown snow or ice fog can be ruled out for the analyzed observation period. As a most likely explanation we found that the larger reservoir of marine ice nucleating particles in the surface-coupled marine boundary layer leads to higher freezing efficiency in the clouds which have at least their base in that layer. This conclusion is corroborated by recent in-situ based studies of the INPC which took place in close vicinity to open water surfaces in the marine Arctic boundary layer. Future studies hence should focus on the linkage between types of aerosols raised to the clouds and the fraction of ice-containing clouds in order to prove the statement. It could also be worth investigating different Arctic and Antarctic cloud datasets with respect to their distance from the marginal ice zone, open leads and polynyas. If indeed INP from marine origin control heterogeneous ice formation that strongly, a decrease of this effect with increasing distance from open water should be detectable. For a better understanding of the phenomenon also measurements in different seasons and regions of the Earth should be done to get knowledge if this effect is only characteristic for the Arctic summer.

*Data availability.* The lidar measurements are available by Griesche et al. (2019), the cloud radar measurements by Griesche et al. (2020). The radiosonde data is available by Schmithüsen (2017a) (PS106.1) and Schmithüsen (2017b) (PS106.2).

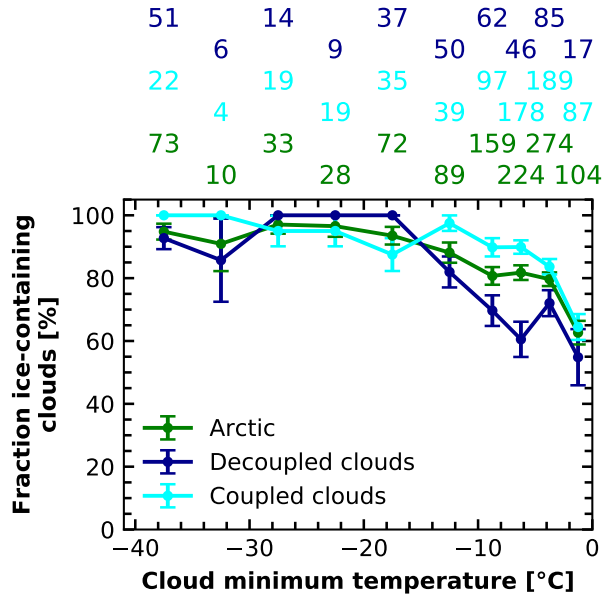

**Figure A1.** Same as Fig. 4 but using the cloud radar for ice detection. In green the results of the complete data set is shown, in cyan for the coupled clouds and in dark blue for the decoupled clouds.

#### Appendix A: Cloud radar for ice detection

To detect ice occurrence with the cloud radar periods, where the cloud radar showed enhanced reflectivity (as can be seen in Fig. 3 (b)) and linear depolarization ratio (LDR) were manually classified as ice-containing. The results are presented in Fig. A1. As expected due to the higher ice-sensitivity of the cloud radar, the detected ice cloud fraction overall increased. Yet, the observed effect remains the same: The surface-coupled clouds showed a stronger ice-cloud occurrence as the decoupled clouds. The effect is smaller as in Fig. 5. A reason for this could be, that the lowest clouds, which are most likely effected by surface sources of INP, are not well represented in this statistics.

#### Appendix B: Test of the coupling retrieval

The coupling retrieval was tested by setting a maximum potential temperature gradient between the surface and the liquid layer base for the surface-coupled state. This gradient was chosen as  $\Delta\theta/\Delta z_{lim} = 2$  K/km, which was the lowest gradient we found in case of decoupled clouds using our approach to determine the surface coupling state. To test our approach only these clouds where beside the original requirement also the gradient between surface and liquid layer base was  $\Delta\theta/\Delta z < \Delta\theta/\Delta z_{lim}$  were considered as surface-coupled. In this case the number of surface-decoupled cloud intervals increased at the expense of the surface-coupled ones (Fig. B1). Also the fraction of ice-containing surface-decoupled clouds increase. Yet, not as much as the fraction of ice-containing surface-coupled clouds and the surface-coupling effect is still obvious and even extend towards

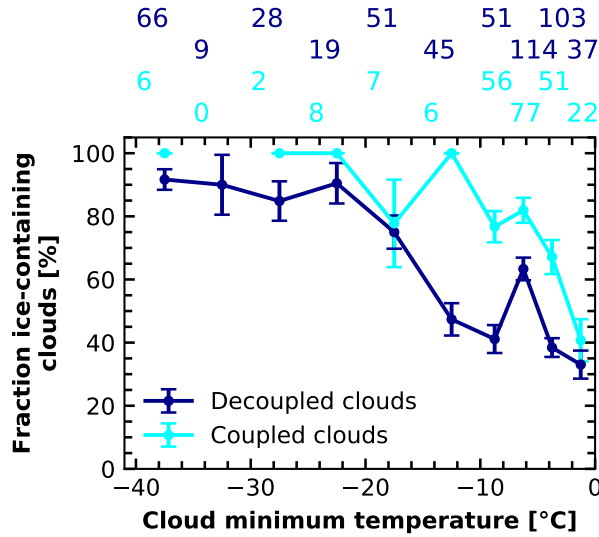

**Figure B1.** Same as Fig. 4 but using also a threshold in the potential temperature gradient to identify surface-coupling.

lower temperatures. However, the number of surface-coupled cloud intervals below -15°C is rather small and the findings here should be taken with care.

The measurement uncertainty in temperature and pressure of the radiosonde RS-92 is given by Vaisala with  $\Delta T = 0.5^\circ\text{C}$  and  $\Delta p = 1\text{hPa}$  (Jensen et al., 2016). As we compare observations within one profile systematic errors can be neglected and only the standard deviation of differences in twin soundings is of interest. This was given by Jensen et al. (2016) as  $\sigma_T = 0.2^\circ\text{C}$  ( $<100\text{hPa}$ ) and  $\sigma_p = 0.3\text{ hPa}$  ( $<100\text{hPa}$ ). Using error propagation we estimate the error in the potential temperature  $\Delta\theta$ . This error was used to calculate the surface coupling state by varying the threshold for the coupling state ( $0.5\text{ K} \pm \Delta\theta$ ). The results are shown in Fig. B2. The variation of the threshold resulted in a change of the number of coupled cloud intervals. In the case of  $0.5\text{ K} + \Delta\theta$  31% of the originally surface-coupled analyzed cloud intervals were classified as decoupled, while for  $0.5\text{ K} - \Delta\theta$  7.5% of the originally surface-decoupled intervals were classified as coupled. Yet, the observed effect on the fraction of ice-containing clouds was within the statistical uncertainty of the original approach and thus the measurement uncertainty of the radiosonde was not further considered in our analysis.

*Author contributions.* HG and KO conducted the ice-containing cloud analysis under supervision of PS. HG performed the lidar analysis under supervision of AA, PS and RE. HG, KO and PS prepared the manuscript. HG finalized the manuscript under supervision of AA, KO and PS.

*Competing interests.* The authors declare that they have no conflict of interest.

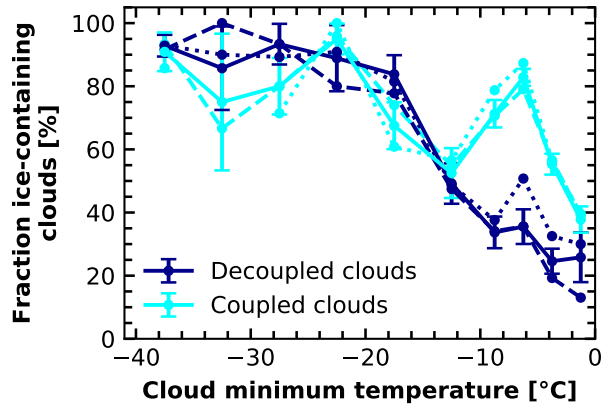

**Figure B2.** Continuous lines same as Fig. 4. The dashed lines represent the respective results for the upper end of the error margin (i.e. profiles were classified as decoupled using a threshold for the coupling state of 0.5 plus the error in  $\theta$ ) and the dotted lines represent the lower end of the error margin (i.e. profiles were classified as decoupled using a threshold for the coupling state of 0.5 K minus the error in  $\theta$ ).

*Acknowledgements.* We gratefully acknowledge the funding by the Deutsche Forschungsgemeinschaft (DFG, German Research Foundation) – Project Number 268020496 – TRR 172, within the Transregional Collaborative Research Center “Arctic Amplification: Climate Relevant Atmospheric and Surface Processes, and Feedback Mechanisms (AC)3”. We thank the Alfred Wegener Institute and R/V Polarstern crew and captain for their support (AWI\_PS106\_00). Authors acknowledge also support through ACTRIS-2 under grant agreement no. 654109 from the European Union’s Horizon 2020 research and innovation programme.

## References

- Ansmann, A., Tesche, M., Althausen, D., Müller, D., Seifert, P., Freudenthaler, V., Heese, B., Wiegner, M., Pisani, G., Knippertz, P., and Dubovik, O.: Influence of Saharan dust on cloud glaciation in southern Morocco during the Saharan Mineral Dust Experiment, *Journal of Geophysical Research: Atmospheres*, 113, <https://doi.org/10.1029/2007JD008785>, <https://agupubs.onlinelibrary.wiley.com/doi/abs/10.1029/2007JD008785>, 2008.
- Ansmann, A., Tesche, M., Seifert, P., Althausen, D., Engelmann, R., Fruntke, J., Wandinger, U., Mattis, I., and Müller, D.: Evolution of the ice phase in tropical altocumulus: SAMUM lidar observations over Cape Verde, *Journal of Geophysical Research: Atmospheres*, 114, <https://doi.org/10.1029/2008JD011659>, <https://agupubs.onlinelibrary.wiley.com/doi/abs/10.1029/2008JD011659>, 2009.
- Baars, H., Kanitz, T., Engelmann, R., Althausen, D., Heese, B., Komppula, M., Preißler, J., Tesche, M., Ansmann, A., Wandinger, U., Lim, J.-H., Ahn, J. Y., Stachlewska, I. S., Amiridis, V., Marinou, E., Seifert, P., Hofer, J., Skupin, A., Schneider, F., Bohlmann, S., Foth, A., Bley, S., Pfüller, A., Giannakaki, E., Lihavainen, H., Viisanen, Y., Hooda, R. K., Pereira, S. N., Bortoli, D., Wagner, F., Mattis, I., Janicka, L., Markowicz, K. M., Achtert, P., Artaxo, P., Pauliquevis, T., Souza, R. A. F., Sharma, V. P., van Zyl, P. G., Beukes, J. P., Sun, J., Rohwer, E. G., Deng, R., Mamouri, R.-E., and Zamorano, F.: An overview of the first decade of Polly<sup>NET</sup>: an emerging network of automated Raman-polarization lidars for continuous aerosol profiling, *Atmospheric Chemistry and Physics*, 16, 5111–5137, <https://doi.org/10.5194/acp-16-5111-2016>, <https://www.atmos-chem-phys.net/16/5111/2016/>, 2016.
- Bigg, E. K.: Ice forming nuclei in the high Arctic, *Tellus B*, 48, 223–233, <https://doi.org/10.1034/j.1600-0889.1996.t01-1-00007.x>, <https://onlinelibrary.wiley.com/doi/abs/10.1034/j.1600-0889.1996.t01-1-00007.x>, 1996.
- Bohlmann, S., Baars, H., Radenz, M., Engelmann, R., and Macke, A.: Ship-borne aerosol profiling with lidar over the Atlantic Ocean: from pure marine conditions to complex dust–smoke mixtures, *Atmospheric Chemistry and Physics*, 18, 9661–9679, <https://doi.org/10.5194/acp-18-9661-2018>, <https://www.atmos-chem-phys.net/18/9661/2018/>, 2018.
- Burrows, S. M., Hoose, C., Pöschl, U., and Lawrence, M. G.: Ice nuclei in marine air: biogenic particles or dust?, *Atmospheric Chemistry and Physics*, 13, 245–267, <https://doi.org/10.5194/acp-13-245-2013>, <https://acp.copernicus.org/articles/13/245/2013/>, 2013.
- Creamean, J. M., Kirpes, R. M., Pratt, K. A., Spada, N. J., Maahn, M., de Boer, G., Schnell, R. C., and China, S.: Marine and terrestrial influences on ice nucleating particles during continuous springtime measurements in an Arctic oilfield location, *Atmospheric Chemistry and Physics*, 18, 18 023–18 042, <https://doi.org/10.5194/acp-18-18023-2018>, <https://www.atmos-chem-phys.net/18/18023/2018/>, 2018.
- de Boer, G., Morrison, H., Shupe, M. D., and Hildner, R.: Evidence of liquid dependent ice nucleation in high-latitude stratiform clouds from surface remote sensors, *Geophysical Research Letters*, 38, <https://doi.org/10.1029/2010GL046016>, <https://agupubs.onlinelibrary.wiley.com/doi/abs/10.1029/2010GL046016>, 2011.
- DeMott, P. J., Prenni, A. J., Liu, X., Kreidenweis, S. M., Petters, M. D., Twohy, C. H., Richardson, M. S., Eidhammer, T., and Rogers, D. C.: Predicting global atmospheric ice nuclei distributions and their impacts on climate, *Proceedings of the National Academy of Sciences*, 107, 11 217–11 222, <https://doi.org/10.1073/pnas.0910818107>, <https://www.pnas.org/content/107/25/11217>, 2010.
- DeMott, P. J., Prenni, A. J., McMeeking, G. R., Sullivan, R. C., Petters, M. D., Tobo, Y., Niemand, M., Möhler, O., Snider, J. R., Wang, Z., and Kreidenweis, S. M.: Integrating laboratory and field data to quantify the immersion freezing ice nucleation activity of mineral dust particles, *Atmospheric Chemistry and Physics*, 15, 393–409, <https://doi.org/10.5194/acp-15-393-2015>, <https://acp.copernicus.org/articles/15/393/2015/>, 2015.



- DeMott, P. J., Hill, T. C. J., McCluskey, C. S., Prather, K. A., Collins, D. B., Sullivan, R. C., Ruppel, M. J., Mason, R. H., Irish, V. E., Lee, T., Hwang, C. Y., Rhee, T. S., Snider, J. R., McMeeking, G. R., Dhaniyala, S., Lewis, E. R., Wentzell, J. J. B., Abbatt, J., Lee, C., Sultana, C. M., Ault, A. P., Axson, J. L., Diaz Martinez, M., Venero, I., Santos-Figueroa, G., Stokes, M. D., Deane, G. B., Mayol-Bracero, O. L., Grassian, V. H., Bertram, T. H., Bertram, A. K., Moffett, B. F., and Franc, G. D.: Sea spray aerosol as a unique source of ice nucleating particles, *Proceedings of the National Academy of Sciences*, 113, 5797–5803, <https://doi.org/10.1073/pnas.1514034112>, <https://www.pnas.org/content/113/21/5797>, 2016.
- Engelmann, R., Kanitz, T., Baars, H., Heese, B., Althausen, D., Skupin, A., Wandinger, U., Komppula, M., Stachlewska, I. S., Amiridis, V., Marinou, E., Mattis, I., Linné, H., and Ansmann, A.: The automated multiwavelength Raman polarization and water-vapor lidar Polly<sup>XT</sup>: the neXT generation, *Atmospheric Measurement Techniques*, 9, 1767–1784, <https://doi.org/10.5194/amt-9-1767-2016>, <https://www.atmos-meas-tech.net/9/1767/2016/>, 2016.
- Engström, A., Karlsson, J., and Svensson, G.: The Importance of Representing Mixed-Phase Clouds for Simulating Distinctive Atmospheric States in the Arctic\*, *Journal of Climate*, 27, 265–272, <https://doi.org/10.1175/JCLI-D-13-00271.1>, <https://doi.org/10.1175/JCLI-D-13-00271.1>, 2014.
- Francis, J. and Skific, N.: Evidence linking rapid Arctic warming to mid-latitude weather patterns, *Philosophical Transactions of the Royal Society A: Mathematical, Physical and Engineering Sciences*, 373, 20140170, <https://doi.org/10.1098/rsta.2014.0170>, <https://royalsocietypublishing.org/doi/abs/10.1098/rsta.2014.0170>, 2015.
- Fridlind, A. M., Ackerman, A. S., McFarquhar, G., Zhang, G., Poellot, M. R., DeMott, P. J., Prenni, A. J., and Heymsfield, A. J.: Ice properties of single-layer stratocumulus during the Mixed-Phase Arctic Cloud Experiment: 2. Model results, *Journal of Geophysical Research: Atmospheres*, 112, <https://doi.org/10.1029/2007JD008646>, <https://agupubs.onlinelibrary.wiley.com/doi/abs/10.1029/2007JD008646>, 2007.
- Gierens, R., Kneifel, S., Shupe, M. D., Ebell, K., Maturilli, M., and Löhnert, U.: Low-level mixed-phase clouds in a complex Arctic environment, *Atmospheric Chemistry and Physics*, 20, 3459–3481, <https://doi.org/10.5194/acp-20-3459-2020>, <https://acp.copernicus.org/articles/20/3459/2020/>, 2020.
- Gong, X., Wex, H., van Pinxteren, M., Triesch, N., Fomba, K. W., Lubitz, J., Stolle, C., Robinson, T.-B., Müller, T., Herrmann, H., and Stratmann, F.: Characterization of aerosol particles at Cabo Verde close to sea level and at the cloud level – Part 2: Ice-nucleating particles in air, cloud and seawater, *Atmospheric Chemistry and Physics*, 20, 1451–1468, <https://doi.org/10.5194/acp-20-1451-2020>, <https://acp.copernicus.org/articles/20/1451/2020/>, 2020.
- Görsdorf, U., Lehmann, V., Bauer-Pfundstein, M., Peters, G., Vavriv, D., Vinogradov, V., and Volkov, V.: A 35-GHz Polarimetric Doppler Radar for Long-Term Observations of Cloud Parameters—Description of System and Data Processing, *Journal of Atmospheric and Oceanic Technology*, 32, 675–690, <https://doi.org/10.1175/JTECH-D-14-00066.1>, <https://doi.org/10.1175/JTECH-D-14-00066.1>, 2015.
- Griesche, H., Seifert, P., Engelmann, R., Radenz, M., and Bühl, J.: OCEANET-ATMOSPHERE PollyXT measurements during POLARSTERN cruise PS106, <https://doi.org/10.1594/PANGAEA.899458>, <https://doi.org/10.1594/PANGAEA.899458>, 2019.
- Griesche, H., Seifert, P., Engelmann, R., Radenz, M., and Bühl, J.: OCEANET-ATMOSPHERE Cloud radar Mira-35 during PS106, <https://doi.org/10.1594/PANGAEA.919556>, <https://doi.org/10.1594/PANGAEA.919556>, 2020.
- Griesche, H. J., Seifert, P., Ansmann, A., Baars, H., Barrientos Velasco, C., Bühl, J., Engelmann, R., Radenz, M., Zhenping, Y., and Macke, A.: Application of the shipborne remote sensing supersite OCEANET for profiling of Arctic aerosols and clouds during *Polarstern* cruise PS106, *Atmospheric Measurement Techniques*, 13, 5335–5358, <https://doi.org/10.5194/amt-13-5335-2020>, <https://amt.copernicus.org/articles/13/5335/2020/>, 2020.

- Groß, S., Tesche, M., Freudenthaler, V., Toledano, C., Wiegner, M., Ansmann, A., Althausen, D., and Seefeldner, M.: Characterization of Saharan dust, marine aerosols and mixtures of biomass-burning aerosols and dust by means of multi-wavelength depolarization and Raman lidar measurements during SAMUM 2, *Tellus B: Chemical and Physical Meteorology*, 63, 706–724, <https://doi.org/10.1111/j.1600-0889.2011.00556.x>, <https://doi.org/10.1111/j.1600-0889.2011.00556.x>, 2011.
- 5 Harrington, J. Y. and Olsson, P. Q.: On the potential influence of ice nuclei on surface-forced marine stratocumulus cloud dynamics, *Journal of Geophysical Research: Atmospheres*, 106, 27 473–27 484, <https://doi.org/10.1029/2000JD000236>, <https://agupubs.onlinelibrary.wiley.com/doi/abs/10.1029/2000JD000236>, 2001.
- Hartmann, M., Adachi, K., Eppers, O., Haas, C., Herber, A., Holzinger, R., Hünnerbein, A., Jäkel, E., Jentsch, C., van Pinxteren, M., Wex, H., Willmes, S., and Stratmann, F.: Wintertime Airborne Measurements of Ice Nucleating Particles in the High Arctic: A Hint to a Marine, Bio-
- 10 genic Source for Ice Nucleating Particles, *Geophysical Research Letters*, 47, e2020GL087 770, <https://doi.org/10.1029/2020GL087770>, <https://agupubs.onlinelibrary.wiley.com/doi/abs/10.1029/2020GL087770>, e2020GL087770 10.1029/2020GL087770, 2020.
- Hoose, C. and Möhler, O.: Heterogeneous ice nucleation on atmospheric aerosols: a review of results from laboratory experiments, *Atmospheric Chemistry and Physics*, 12, 9817–9854, <https://doi.org/10.5194/acp-12-9817-2012>, <https://www.atmos-chem-phys.net/12/9817/2012/>, 2012.
- 15 Ickes, L., Porter, G. C. E., Wagner, R., Adams, M. P., Bierbauer, S., Bertram, A. K., Bilde, M., Christiansen, S., Ekman, A. M. L., Gorokhova, E., Höhler, K., Kiselev, A. A., Leck, C., Möhler, O., Murray, B. J., Schiebel, T., Ullrich, R., and Salter, M. E.: The ice-nucleating activity of Arctic sea surface microlayer samples and marine algal cultures, *Atmospheric Chemistry and Physics*, 20, 11 089–11 117, <https://doi.org/10.5194/acp-20-11089-2020>, <https://acp.copernicus.org/articles/20/11089/2020/>, 2020.
- Illingworth, A. J., Hogan, R. J., O'Connor, E., Bouniol, D., Brooks, M. E., Delanoë, J., Donovan, D. P., Eastment, J. D., Gaussiat, N.,
- 20 Goddard, J. W. F., Haefelin, M., Baltink, H. K., Krasnov, O. A., Pelon, J., Piriou, J.-M., Protat, A., Russchenberg, H. W. J., Seifert, A., Tompkins, A. M., van Zadelhoff, G.-J., Vinit, F., Willén, U., Wilson, D. R., and Wrench, C. L.: Cloudnet, *Bulletin of the American Meteorological Society*, 88, 883–898, <https://doi.org/10.1175/BAMS-88-6-883>, <https://doi.org/10.1175/BAMS-88-6-883>, 2007.
- Intrieri, J. M. and Shupe, M. D.: Characteristics and Radiative Effects of Diamond Dust over the Western Arctic Ocean Region, *Journal of Climate*, 17, 2953–2960, [https://doi.org/10.1175/1520-0442\(2004\)017<2953:CAREOD>2.0.CO;2](https://doi.org/10.1175/1520-0442(2004)017<2953:CAREOD>2.0.CO;2), [https://doi.org/10.1175/1520-0442\(2004\)](https://doi.org/10.1175/1520-0442(2004)017<2953:CAREOD>2.0.CO;2)
- 25 017<2953:CAREOD>2.0.CO;2, 2004.
- Jensen, M. P., Holdridge, D. J., Survo, P., Lehtinen, R., Baxter, S., Toto, T., and Johnson, K. L.: Comparison of Vaisala radiosondes RS41 and RS92 at the ARM Southern Great Plains site, *Atmospheric Measurement Techniques*, 9, 3115–3129, <https://doi.org/10.5194/amt-9-3115-2016>, <https://www.atmos-meas-tech.net/9/3115/2016/>, 2016.
- Jimenez, C., Ansmann, A., Engelmann, R., Donovan, D., Malinka, A., Schmidt, J., Seifert, P., and Wandinger, U.: The dual-field-of-
- 30 view polarization lidar technique: A new concept in monitoring aerosol effects in liquid-water clouds – Theoretical framework, *Atmospheric Chemistry and Physics Discussions*, 2020, 1–27, <https://doi.org/10.5194/acp-2020-473>, <https://acp.copernicus.org/preprints/acp-2020-473/>, 2020.
- Jouan, C., Pelon, J., Girard, E., Ancellet, G., Blanchet, J. P., and Delanoë, J.: On the relationship between Arctic ice clouds and polluted air masses over the North Slope of Alaska in April 2008, *Atmospheric Chemistry and Physics*, 14, 1205–1224, [https://doi.org/10.5194/acp-](https://doi.org/10.5194/acp-14-1205-2014)
- 35 14-1205-2014, <https://www.atmos-chem-phys.net/14/1205/2014/>, 2014.
- Kalesse, H., de Boer, G., Solomon, A., Oue, M., Ahlgrimm, M., Zhang, D., Shupe, M. D., Luke, E., and Protat, A.: Understanding Rapid Changes in Phase Partitioning between Cloud Liquid and Ice in Stratiform Mixed-Phase Clouds: An Arctic Case Study, *Monthly Weather Review*, 144, 4805–4826, <https://doi.org/10.1175/MWR-D-16-0155.1>, <https://doi.org/10.1175/MWR-D-16-0155.1>, 2016.

- Kanitz, T., Seifert, P., Ansmann, A., Engelmann, R., Althausen, D., Casiccia, C., and Rohwer, E. G.: Contrasting the impact of aerosols at northern and southern midlatitudes on heterogeneous ice formation, *Geophysical Research Letters*, 38, <https://doi.org/10.1029/2011GL048532>, <https://agupubs.onlinelibrary.wiley.com/doi/abs/10.1029/2011GL048532>, 2011.
- Kanitz, T., Ansmann, A., Engelmann, R., and Althausen, D.: North-south cross sections of the vertical aerosol distribution over the Atlantic Ocean from multiwavelength Raman/polarization lidar during Polarstern cruises, *Journal of Geophysical Research: Atmospheres*, 118, 2643–2655, <https://doi.org/10.1002/jgrd.50273>, <https://agupubs.onlinelibrary.wiley.com/doi/abs/10.1002/jgrd.50273>, 2013.
- Kay, J. E. and L'Ecuyer, T.: Observational constraints on Arctic Ocean clouds and radiative fluxes during the early 21st century, *Journal of Geophysical Research: Atmospheres*, 118, 7219–7236, <https://doi.org/10.1002/jgrd.50489>, <https://agupubs.onlinelibrary.wiley.com/doi/abs/10.1002/jgrd.50489>, 2013.
- 10 Kim, K.-Y., Kim, J., Yeo, S., Na, H., Hamlington, B. D., and Leben, R. R.: Understanding the Mechanism of Arctic Amplification and Sea Ice Loss, *The Cryosphere Discussions*, 2017, 1–22, <https://doi.org/10.5194/tc-2017-39>, <https://www.the-cryosphere-discuss.net/tc-2017-39/>, 2017.
- Klein, S. A., McCoy, R. B., Morrison, H., Ackerman, A. S., Avramov, A., Boer, G. d., Chen, M., Cole, J. N. S., Del Genio, A. D., Falk, M., Foster, M. J., Fridlind, A., Golaz, J.-C., Hashino, T., Harrington, J. Y., Hoose, C., Khairoutdinov, M. F., Larson, V. E., Liu, X., Luo, Y., McFarquhar, G. M., Menon, S., Neggers, R. A. J., Park, S., Poellot, M. R., Schmidt, J. M., Sednev, I., Shipway, B. J., Shupe, M. D., Spangenberg, D. A., Sud, Y. C., Turner, D. D., Veron, D. E., Salzen, K. v., Walker, G. K., Wang, Z., Wolf, A. B., Xie, S., Xu, K.-M., Yang, F., and Zhang, G.: Intercomparison of model simulations of mixed-phase clouds observed during the ARM Mixed-Phase Arctic Cloud Experiment. I: single-layer cloud, *Quarterly Journal of the Royal Meteorological Society*, 135, 979–1002, <https://doi.org/10.1002/qj.416>, <https://rmets.onlinelibrary.wiley.com/doi/abs/10.1002/qj.416>, 2009.
- 15 Y., Shupe, M., Wang, Z., and Mace, G.: Cloud vertical distribution from combined surface and space radar/lidar observations at two Arctic atmospheric observations, *Atmospheric Chemistry and Physics Discussions*, pp. 1–28, <https://doi.org/10.5194/acp-2016-1132>, 2017.
- Lohmann, U.: Anthropogenic Aerosol Influences on Mixed-Phase Clouds, *Current Climate Change Reports*, 3, 32–44, <https://doi.org/10.1007/s40641-017-0059-9>, 2017.
- Macke, A. and Flores, H.: The Expeditions PS106/1 and 2 of the Research Vessel POLARSTERN to the Arctic Ocean in 2017, Alfred Wegener Institute for Polar and Marine Research, [https://doi.org/10.2312/BzPM\\_0719\\_2018](https://doi.org/10.2312/BzPM_0719_2018), 2018.
- 20 Mamouri, R.-E. and Ansmann, A.: Potential of polarization lidar to provide profiles of CCN- and INP-relevant aerosol parameters, *Atmospheric Chemistry and Physics*, 16, 5905–5931, <https://doi.org/10.5194/acp-16-5905-2016>, <https://www.atmos-chem-phys.net/16/5905/2016/>, 2016.
- Müller, D., Ansmann, A., Mattis, I., Tesche, M., Wandinger, U., Althausen, D., and Pisani, G.: Aerosol-type-dependent lidar ratios observed with Raman lidar, *Journal of Geophysical Research: Atmospheres*, 112, D16 202, <https://doi.org/10.1029/2006JD008292>, <https://agupubs.onlinelibrary.wiley.com/doi/abs/10.1029/2006JD008292>, 2007.
- 30 Morrison, H., Zuidema, P., Ackerman, A. S., Avramov, A., de Boer, G., Fan, J., Fridlind, A. M., Hashino, T., Harrington, J. Y., Luo, Y., Ovchinnikov, M., and Shipway, B.: Intercomparison of cloud model simulations of Arctic mixed-phase boundary layer clouds observed during SHEBA/FIRE-ACE, *Journal of Advances in Modeling Earth Systems*, 3, <https://doi.org/https://doi.org/10.1029/2011MS000066>, <https://agupubs.onlinelibrary.wiley.com/doi/abs/10.1029/2011MS000066>, 2011.
- 35 Morrison, H., de Boer, G., Feingold, G., Harrington, J., Shupe, M. D., and Sulia, K.: Resilience of persistent Arctic mixed-phase clouds, *Nature Geoscience*, 5, 11–17, <https://doi.org/10.1038/ngeo1332>, 2012.

- Murray, B. J., O'Sullivan, D., Atkinson, J. D., and Webb, M. E.: Ice nucleation by particles immersed in supercooled cloud droplets, *Chem. Soc. Rev.*, 41, 6519–6554, <https://doi.org/10.1039/C2CS35200A>, <http://dx.doi.org/10.1039/C2CS35200A>, 2012.
- Neggers, R. A. J., Chylik, J., Egerer, U., Griesche, H., Schemann, V., Seifert, P., Siebert, H., and Macke, A.: Local and Remote Controls on Arctic Mixed-Layer Evolution, *Journal of Advances in Modeling Earth Systems*, 11, 2214–2237, <https://doi.org/10.1029/2019MS001671>,  
5 <https://agupubs.onlinelibrary.wiley.com/doi/abs/10.1029/2019MS001671>, 2019.
- Niemand, M., Möhler, O., Vogel, B., Vogel, H., Hoose, C., Connolly, P., Klein, H., Bingemer, H., DeMott, P., Skrotzki, J., and Leisner, T.: A Particle-Surface-Area-Based Parameterization of Immersion Freezing on Desert Dust Particles, *Journal of the Atmospheric Sciences*, 69, 3077–3092, <https://doi.org/10.1175/JAS-D-11-0249.1>, <https://doi.org/10.1175/JAS-D-11-0249.1>, 2012.
- Noel, V. and Sassen, K.: Study of Planar Ice Crystal Orientations in Ice Clouds from Scanning Polarization Lidar Observations, *Journal of Applied Meteorology*, 44, 653 – 664, <https://doi.org/10.1175/JAM2223.1>, <https://journals.ametsoc.org/view/journals/apme/44/5/jam2223.1.xml>, 2005.  
10
- Noel, V., Roy, G., Bissonnette, L., Chepfer, H., and Flamant, P.: Analysis of lidar measurements of ice clouds at multiple incidence angles, *Geophysical Research Letters*, 29, 52–1–52–4, <https://doi.org/https://doi.org/10.1029/2002GL014828>, <https://agupubs.onlinelibrary.wiley.com/doi/abs/10.1029/2002GL014828>, 2002.
- Noel, V., Winker, D. M., McGill, M., and Lawson, P.: Classification of particle shapes from lidar depolarization ratio in convective ice clouds compared to in situ observations during CRYSTAL-FACE, *Journal of Geophysical Research: Atmospheres*, 109, <https://doi.org/https://doi.org/10.1029/2004JD004883>, <https://agupubs.onlinelibrary.wiley.com/doi/abs/10.1029/2004JD004883>, 2004.  
15
- Nomokonova, T., Ebell, K., Löhnert, U., Maturilli, M., Ritter, C., and O'Connor, E.: Statistics on clouds and their relation to thermodynamic conditions at Ny-Ålesund using ground-based sensor synergy, *Atmospheric Chemistry and Physics*, 19, 4105–4126, <https://doi.org/10.5194/acp-19-4105-2019>, <https://www.atmos-chem-phys.net/19/4105/2019/>, 2019.  
20
- Norgren, M. S., de Boer, G., and Shupe, M. D.: Observed aerosol suppression of cloud ice in low-level Arctic mixed-phase clouds, *Atmospheric Chemistry and Physics*, 18, 13 345–13 361, <https://doi.org/10.5194/acp-18-13345-2018>, <https://www.atmos-chem-phys.net/18/13345/2018/>, 2018.
- O'Sullivan, D., Adams, M. P., Tarn, M. D., Harrison, A. D., Vergara-Temprado, J., Porter, G. C. E., Holden, M. A., Sanchez-Marroquin, A., Carotenuto, F., Whale, T. F., McQuaid, J. B., Walshaw, R., Hedges, D. H. P., Burke, I. T., Cui, Z., and Murray, B. J.: Contributions of biogenic material to the atmospheric ice-nucleating particle population in North Western Europe, *Scientific Reports*, 8, 13 821, <https://doi.org/10.1038/s41598-018-31981-7>, 2018.  
25
- Pisso, I., Sollum, E., Grythe, H., Kristiansen, N. I., Cassiani, M., Eckhardt, S., Arnold, D., Morton, D., Thompson, R. L., Groot Zwaafink, C. D., Evangeliou, N., Sodemann, H., Haimberger, L., Henne, S., Brunner, D., Burkhardt, J. F., Fouilloux, A., Brioude, J., Philipp, A., Seibert, P., and Stohl, A.: The Lagrangian particle dispersion model FLEXPART version 10.4, *Geoscientific Model Development*, 12, 4955–4997, <https://doi.org/10.5194/gmd-12-4955-2019>, <https://gmd.copernicus.org/articles/12/4955/2019/>, 2019.  
30
- Pithan, F. and Mauritsen, T.: Arctic amplification dominated by temperature feedbacks in contemporary climate models, *Nature Geoscience*, 7, 181, <https://doi.org/10.1038/ngeo2071>, 2014.
- Qiu, S., Dong, X., xi, B., and Li, J.-L.: Characterizing Arctic mixed-phase cloud structure and its relationship with humidity and temperature inversion using ARM NSA Observations, *Journal of Geophysical Research: Atmospheres*, 120, 7737–7746, <https://doi.org/10.1002/2014JD023022>, 2015.  
35

- Qiu, S., Xi, B., and Dong, X.: Influence of Wind Direction on Thermodynamic Properties and Arctic Mixed-Phase Clouds in Autumn at Utqiagvik, Alaska, *Journal of Geophysical Research: Atmospheres*, 123, 9589–9603, <https://doi.org/10.1029/2018JD028631>, <https://agupubs.onlinelibrary.wiley.com/doi/abs/10.1029/2018JD028631>, 2018.
- Radenz, M., Seifert, P., Baars, H., Floutsis, A. A., Yin, Z., and Bühl, J.: Automated time-height-resolved air mass source attribution for profiling remote sensing applications, *Atmospheric Chemistry and Physics Discussions*, 2020, 1–21, <https://doi.org/10.5194/acp-2020-955>, <https://acp.copernicus.org/preprints/acp-2020-955/>, 2020.
- Rogers, D. C. and Vali, G.: Ice Crystal Production by Mountain Surfaces, *Journal of Applied Meteorology and Climatology*, 26, 1152 – 1168, [https://doi.org/10.1175/1520-0450\(1987\)026<1152:ICPBMS>2.0.CO;2](https://doi.org/10.1175/1520-0450(1987)026<1152:ICPBMS>2.0.CO;2), [https://journals.ametsoc.org/view/journals/apme/26/9/1520-0450\\_1987\\_026\\_1152\\_icpbms\\_2\\_0\\_co\\_2.xml](https://journals.ametsoc.org/view/journals/apme/26/9/1520-0450_1987_026_1152_icpbms_2_0_co_2.xml), 1987.
- 10 Rose, T., Crewell, S., Löhnert, U., and Simmer, C.: A network suitable microwave radiometer for operational monitoring of the cloudy atmosphere, *Atmospheric Research*, 75, 183 – 200, <https://doi.org/https://doi.org/10.1016/j.atmosres.2004.12.005>, <http://www.sciencedirect.com/science/article/pii/S0169809505000189>, cLIWA-NET: Observation and Modelling of Liquid Water Clouds, 2005.
- Sandvik, A., Biryulina, M., Kvamstø, N. G., Stamnes, J. J., and Stamnes, K.: Observed and simulated microphysical composition of arctic clouds: Data properties and model validation, *Journal of Geophysical Research: Atmospheres*, 112, <https://doi.org/10.1029/2006JD007351>, <https://agupubs.onlinelibrary.wiley.com/doi/abs/10.1029/2006JD007351>, 2007.
- 15 Sassen, K.: Polarization in Lidar, pp. 19–42, Springer New York, New York, NY, [https://doi.org/10.1007/0-387-25101-4\\_2](https://doi.org/10.1007/0-387-25101-4_2), [https://doi.org/10.1007/0-387-25101-4\\_2](https://doi.org/10.1007/0-387-25101-4_2), 2005.
- Sassen, K. and Takano, Y.: Parry arc: a polarization lidar, ray-tracing, and aircraft case study, *Appl. Opt.*, 39, 6738–6745, <https://doi.org/10.1364/AO.39.006738>, <http://ao.osa.org/abstract.cfm?URI=ao-39-36-6738>, 2000.
- 20 Schmithüsen, H.: Upper air soundings during POLARSTERN cruise PS106/1 (ARK-XXXI/1.1), <https://doi.org/10.1594/PANGAEA.882736>, <https://doi.org/10.1594/PANGAEA.882736>, 2017a.
- Schmithüsen, H.: Upper air soundings during POLARSTERN cruise PS106/2 (ARK-XXXI/1.2), <https://doi.org/10.1594/PANGAEA.882843>, <https://doi.org/10.1594/PANGAEA.882843>, 2017b.
- Schnell, R. C. and Vali, G.: Biogenic Ice Nuclei: Part I. Terrestrial and Marine Sources, *Journal of the Atmospheric Sciences*, 33, 1554–1564, [https://doi.org/10.1175/1520-0469\(1976\)033<1554:BINPIT>2.0.CO;2](https://doi.org/10.1175/1520-0469(1976)033<1554:BINPIT>2.0.CO;2), [https://doi.org/10.1175/1520-0469\(1976\)033<1554:BINPIT>2.0.CO;2](https://doi.org/10.1175/1520-0469(1976)033<1554:BINPIT>2.0.CO;2), 1976.
- 25 Seifert, P., Ansmann, A., Mattis, I., Wandinger, U., Tesche, M., Engelmann, R., Müller, D., Pérez, C., and Hausteine, K.: Saharan dust and heterogeneous ice formation: Eleven years of cloud observations at a central European EARLINET site, *J. Geophys. Res.*, 115, D20 201, <https://doi.org/10.1029/2009jd013222>, <https://doi.org/10.1029/2009JD013222>, 2010.
- 30 Seifert, P., Kunz, C., Baars, H., Ansmann, A., Bühl, J., Senf, F., Engelmann, R., Althausen, D., and Artaxo, P.: Seasonal variability of heterogeneous ice formation in stratiform clouds over the Amazon Basin, *Geophysical Research Letters*, 42, 5587–5593, <https://doi.org/10.1002/2015GL064068>, <https://agupubs.onlinelibrary.wiley.com/doi/abs/10.1002/2015GL064068>, 2015.
- Serreze, M. C. and Barry, R. G.: Processes and impacts of Arctic amplification: A research synthesis, *Global and Planetary Change*, 77, 85 – 96, <https://doi.org/https://doi.org/10.1016/j.gloplacha.2011.03.004>, <http://www.sciencedirect.com/science/article/pii/S0921818111000397>, 2011.
- 35 Serreze, M. C. and Barry, R. G.: The Arctic Climate System, Cambridge Atmospheric and Space Science Series, Cambridge University Press, 2 edn., <https://doi.org/10.1017/CBO9781139583817>, 2014.

- Serreze, M. C. and Francis, J. A.: The Arctic Amplification Debate, *Climatic Change*, 76, 241–264, <https://doi.org/10.1007/s10584-005-9017-y>, 2006.
- Shupe, M. D.: A ground-based multisensor cloud phase classifier, *Geophysical Research Letters*, 34, <https://doi.org/10.1029/2007GL031008>, <https://agupubs.onlinelibrary.wiley.com/doi/abs/10.1029/2007GL031008>, 2007.
- 5 Shupe, M. D.: Clouds at Arctic Atmospheric Observatories. Part II: Thermodynamic Phase Characteristics, *Journal of Applied Meteorology and Climatology*, 50, 645–661, <https://doi.org/10.1175/2010JAMC2468.1>, <https://doi.org/10.1175/2010JAMC2468.1>, 2011.
- Shupe, M. D., Walden, V. P., Eloranta, E., Uttal, T., Campbell, J. R., Starkweather, S. M., and Shiobara, M.: Clouds at Arctic Atmospheric Observatories. Part I: Occurrence and Macrophysical Properties, *Journal of Applied Meteorology and Climatology*, 50, 626–644, <https://doi.org/10.1175/2010JAMC2467.1>, <https://doi.org/10.1175/2010JAMC2467.1>, 2011.
- 10 Shupe, M. D., Persson, P. O. G., Brooks, I. M., Tjernstrom, M., Sedlar, J., Mauritsen, T., Sjogren, S., and Leck, C.: Cloud and boundary layer interactions over the Arctic sea ice in late summer, *Atmospheric Chemistry and Physics*, 13, 9379–9399, <https://doi.org/10.5194/acp-13-9379-2013>, 2013.
- Silber, I., Verlinde, J., Eloranta, E. W., Flynn, C. J., and Flynn, D. M.: Polar Liquid Cloud Base Detection Algorithms for High Spectral Resolution or Micropulse Lidar Data, *Journal of Geophysical Research: Atmospheres*, 123, 4310–4322, <https://doi.org/https://doi.org/10.1029/2017JD027840>, <https://agupubs.onlinelibrary.wiley.com/doi/abs/10.1029/2017JD027840>, 2018.
- 15 Silber, I., Fridlind, A. M., Verlinde, J., Russell, L. M., and Ackerman, A. S.: Nonturbulent Liquid-Bearing Polar Clouds: Observed Frequency of Occurrence and Simulated Sensitivity to Gravity Waves, *Geophysical Research Letters*, 47, e2020GL087099, <https://doi.org/https://doi.org/10.1029/2020GL087099>, <https://agupubs.onlinelibrary.wiley.com/doi/abs/10.1029/2020GL087099>, e2020GL087099 2020GL087099, 2020.
- 20 Smirnov, A., Holben, B. N., Slutsker, I., Giles, D. M., McClain, C. R., Eck, T. F., Sakerin, S. M., Macke, A., Croot, P., Zibordi, G., Quinn, P. K., Sciare, J., Kinne, S., Harvey, M., Smyth, T. J., Piketh, S., Zielinski, T., Proshutinsky, A., Goes, J. I., Nelson, N. B., Larouche, P., Radionov, V. F., Goloub, P., Krishna Moorthy, K., Matarrese, R., Robertson, E. J., and Jourdin, F.: Maritime Aerosol Network as a component of Aerosol Robotic Network, *Journal of Geophysical Research: Atmospheres*, 114, <https://doi.org/https://doi.org/10.1029/2008JD011257>, <https://agupubs.onlinelibrary.wiley.com/doi/abs/10.1029/2008JD011257>, 2009.
- 25 Solomon, A., Shupe, M. D., Persson, O., Morrison, H., Yamaguchi, T., Caldwell, P. M., and de Boer, G.: The Sensitivity of Springtime Arctic Mixed-Phase Stratocumulus Clouds to Surface-Layer and Cloud-Top Inversion-Layer Moisture Sources, *Journal of the Atmospheric Sciences*, 71, 574–595, <https://doi.org/10.1175/JAS-D-13-0179.1>, <https://doi.org/10.1175/JAS-D-13-0179.1>, 2014.
- Sotiropoulou, G., Sedlar, J., Tjernström, M., Shupe, M. D., Brooks, I. M., and Persson, P. O. G.: The thermodynamic structure of summer Arctic stratocumulus and the dynamic coupling to the surface, *Atmospheric Chemistry and Physics*, 14, 12573–12592, <https://doi.org/10.5194/acp-14-12573-2014>, <https://www.atmos-chem-phys.net/14/12573/2014/>, 2014.
- 30 Stephens, G. L.: Cloud Feedbacks in the Climate System: A Critical Review, *Journal of Climate*, 18, 237–273, <https://doi.org/10.1175/JCLI-3243.1>, <https://doi.org/10.1175/JCLI-3243.1>, 2005.
- Szyrmer, W. and Zawadzki, I.: Biogenic and Anthropogenic Sources of Ice-Forming Nuclei: A Review, *Bulletin of the American Meteorological Society*, 78, 209–228, [https://doi.org/10.1175/1520-0477\(1997\)078<0209:BAASOI>2.0.CO;2](https://doi.org/10.1175/1520-0477(1997)078<0209:BAASOI>2.0.CO;2), [https://doi.org/10.1175/1520-0477\(1997\)078<0209:BAASOI>2.0.CO;2](https://doi.org/10.1175/1520-0477(1997)078<0209:BAASOI>2.0.CO;2), 1997.
- 35 Tesche, M., Ansmann, A., Müller, D., Althausen, D., Mattis, I., Heese, B., Freudenthaler, V., Wiegner, M., Esselborn, M., Pisani, G., and Knippertz, P.: Vertical profiling of Saharan dust with Raman lidars and airborne HSRL in southern Morocco during SAMUM, Tel-



- lus B: Chemical and Physical Meteorology, 61, 144–164, <https://doi.org/10.1111/j.1600-0889.2008.00390.x>, <https://doi.org/10.1111/j.1600-0889.2008.00390.x>, 2009.
- Thomson, E. S., Weber, D., Bingemer, H. G., Tuomi, J., Ebert, M., and Pettersson, J. B. C.: Intensification of ice nucleation observed in ocean ship emissions, *Scientific Reports*, 8, 1111, <https://doi.org/10.1038/s41598-018-19297-y>, 2018.
- 5 Ullrich, R., Hoose, C., Möhler, O., Niemand, M., Wagner, R., Höhler, K., Hiranuma, N., Saathoff, H., and Leisner, T.: A New Ice Nucleation Active Site Parameterization for Desert Dust and Soot, *Journal of the Atmospheric Sciences*, 74, 699–717, <https://doi.org/10.1175/JAS-D-16-0074.1>, <https://doi.org/10.1175/JAS-D-16-0074.1>, 2017.
- van Diedenhoven, B., Fridlind, A. M., Ackerman, A. S., Eloranta, E. W., and McFarquhar, G. M.: An evaluation of ice formation in large-eddy simulations of supercooled Arctic stratocumulus using ground-based lidar and cloud radar, *Journal of Geophysical Research: Atmospheres*, 114, <https://doi.org/10.1029/2008JD011198>, <https://agupubs.onlinelibrary.wiley.com/doi/abs/10.1029/2008JD011198>, 2009.
- 10 Vassel, M., Ickes, L., Maturilli, M., and Hoose, C.: Classification of Arctic multilayer clouds using radiosonde and radar data in Svalbard, *Atmospheric Chemistry and Physics*, 19, 5111–5126, <https://doi.org/10.5194/acp-19-5111-2019>, <https://acp.copernicus.org/articles/19/5111/2019/>, 2019.
- Vavrus, S.: The Impact of Cloud Feedbacks on Arctic Climate under Greenhouse Forcing\*, *Journal of Climate*, 17, 603–615, [https://doi.org/10.1175/1520-0442\(2004\)017<0603:TIOCFO>2.0.CO;2](https://doi.org/10.1175/1520-0442(2004)017<0603:TIOCFO>2.0.CO;2), [https://doi.org/10.1175/1520-0442\(2004\)017<0603:TIOCFO>2.0.CO;2](https://doi.org/10.1175/1520-0442(2004)017<0603:TIOCFO>2.0.CO;2), 2004.
- 15 Verlinde, J., Rambukkange, M., Clothiaux, E., Mcfarquhar, G., and Eloranta, E.: Arctic multilayered, mixed-phase cloud processes revealed in millimeter-wave cloud radar Doppler spectra, *Journal of Geophysical Research*, 118, <https://doi.org/10.1002/2013JD020183>, 2013.
- Welti, A., Müller, K., Fleming, Z. L., and Stratmann, F.: Concentration and variability of ice nuclei in the subtropical maritime boundary layer, *Atmospheric Chemistry and Physics*, 18, 5307–5320, <https://doi.org/10.5194/acp-18-5307-2018>, <https://acp.copernicus.org/articles/18/5307/2018/>, 2018.
- 20 Wendisch, M., Macke, A., Ehrlich, A., Lüpkes, C., Mech, M., Chechin, D., Dethloff, K., Velasco, C. B., Bozem, H., Brückner, M., Clemen, H.-C., Crewell, S., Donth, T., Dupuy, R., Ebell, K., Egerer, U., Engelmann, R., Engler, C., Eppers, O., Gehrmann, M., Gong, X., Gottschalk, M., Gourbeyre, C., Griesche, H., Hartmann, J., Hartmann, M., Heinold, B., Herber, A., Herrmann, H., Heygster, G., Hoor, P., Jafariserajehlou, S., Jäkel, E., Järvinen, E., Jourdan, O., Kästner, U., Kecorius, S., Knudsen, E. M., Köllner, F., Kretzschmar, J., Lelli, L., Leroy, D., Maturilli, M., Mei, L., Mertes, S., Mioche, G., Neuber, R., Nicolaus, M., Nomokonova, T., Notholt, J., Palm, M., van Pinxteren, M., Quaas, J., Richter, P., Ruiz-Donoso, E., Schäfer, M., Schmieder, K., Schnaiter, M., Schneider, J., Schwarzenböck, A., Seifert, P., Shupe, M. D., Siebert, H., Spreen, G., Stapf, J., Stratmann, F., Vogl, T., Welti, A., Wex, H., Wiedensohler, A., Zannatta, M., and Zeppenfeld, S.: The Arctic Cloud Puzzle: Using ACLOUD/PASCAL Multiplatform Observations to Unravel the Role of Clouds and Aerosol Particles in Arctic Amplification, *Bulletin of the American Meteorological Society*, 100, 841–871, <https://doi.org/10.1175/BAMS-D-18-0072.1>, <https://doi.org/10.1175/BAMS-D-18-0072.1>, 2019.
- 30 Westbrook, C. D. and Illingworth, A. J.: Evidence that ice forms primarily in supercooled liquid clouds at temperatures > -27°C, *Geophysical Research Letters*, 38, <https://doi.org/10.1029/2011GL048021>, <https://agupubs.onlinelibrary.wiley.com/doi/abs/10.1029/2011GL048021>, 2011.
- 35 Westbrook, C. D., Illingworth, A. J., O'Connor, E. J., and Hogan, R. J.: Doppler lidar measurements of oriented planar ice crystals falling from supercooled and glaciated layer clouds, *Quarterly Journal of the Royal Meteorological Society*, 136, 260–276, <https://doi.org/https://doi.org/10.1002/qj.528>, <https://rmets.onlinelibrary.wiley.com/doi/abs/10.1002/qj.528>, 2010.

- Wex, H., Huang, L., Zhang, W., Hung, H., Traversi, R., Becagli, S., Sheesley, R. J., Moffett, C. E., Barrett, T. E., Bossi, R., Skov, H., Hünerbein, A., Lubitz, J., Löffler, M., Linke, O., Hartmann, M., Herenz, P., and Stratmann, F.: Annual variability of ice-nucleating particle concentrations at different Arctic locations, *Atmospheric Chemistry and Physics*, 19, 5293–5311, <https://doi.org/10.5194/acp-19-5293-2019>, <https://acp.copernicus.org/articles/19/5293/2019/>, 2019.
- 5 Yin, Z., Ansmann, A., Baars, H., Seifert, P., Engelmann, R., Radenz, M., Jimenez, C., Herzog, A., Ohneiser, K., Hanbuch, K., Blarel, L., Goloub, P., Dubois, G., Victori, S., and Maupin, F.: Aerosol measurements with a shipborne Sun–sky–lunar photometer and collocated multiwavelength Raman polarization lidar over the Atlantic Ocean, *Atmospheric Measurement Techniques*, 12, 5685–5698, <https://doi.org/10.5194/amt-12-5685-2019>, <https://www.atmos-meas-tech.net/12/5685/2019/>, 2019.
- 10 Zhang, D., Wang, Z., Luo, T., Yin, Y., and Flynn, C.: The occurrence of ice production in slightly supercooled Arctic stratiform clouds as observed by ground-based remote sensors at the ARM NSA site, *Journal of Geophysical Research: Atmospheres*, 122, 2867–2877, <https://doi.org/10.1002/2016JD026226>, <https://agupubs.onlinelibrary.wiley.com/doi/abs/10.1002/2016JD026226>, 2017.
- Zhang, D., Wang, Z., Kollias, P., Vogelmann, A. M., Yang, K., and Luo, T.: Ice particle production in mid-level stratiform mixed-phase clouds observed with collocated A-Train measurements, *Atmospheric Chemistry and Physics*, 18, 4317–4327, <https://doi.org/10.5194/acp-18-4317-2018>, <https://www.atmos-chem-phys.net/18/4317/2018/>, 2018.
